# Supplementary material for: Whole-genome resequencing reveals Brassica napus origin and genetic loci involved in its improvement
Source: PubMed Central journal article supplement (PMC6411957; doi:10.1038/s41467-019-09134-9), 2019-03-11
Supplement: 41467_2019_9134_MOESM1_ESM.pdf [file 41467_2019_9134_MOESM1_ESM.pdf]

**Whole-genome resequencing reveals *Brassica napus* origin and genetic loci involved in its improvement**

Lu *et al.*

## Supplementary Figures

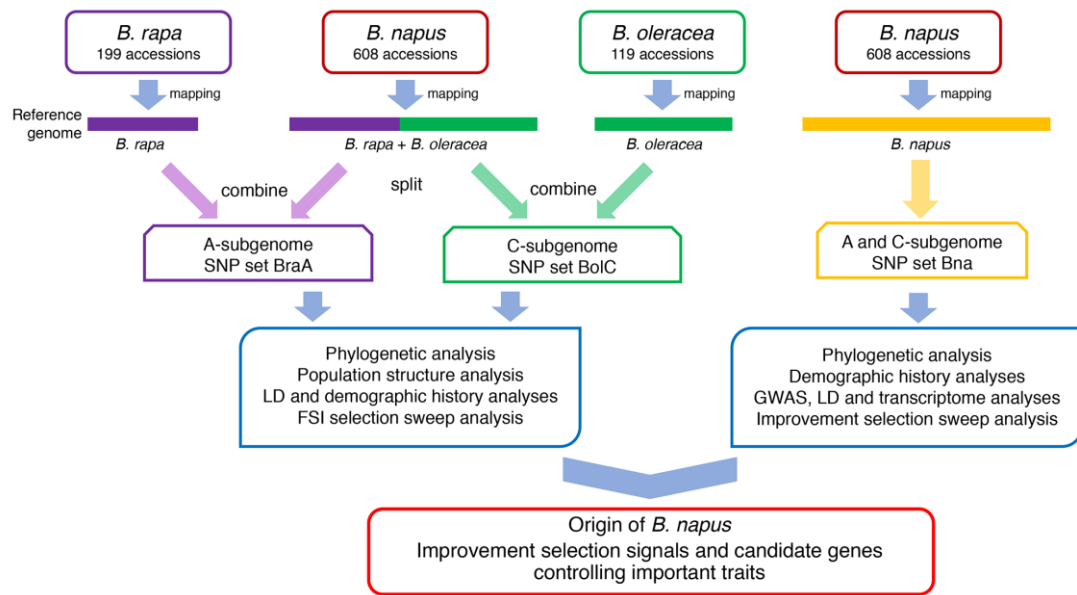

Supplementary Figure 1. Workflow performed in this study.

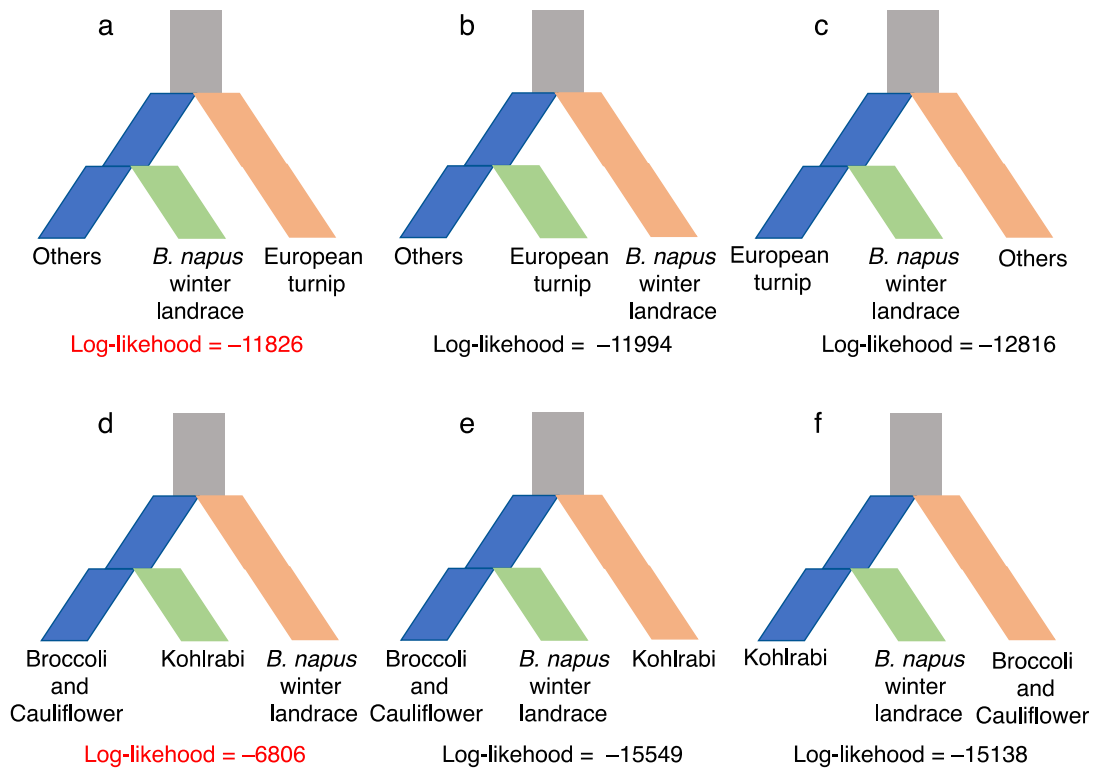

**Supplementary Figure 2. The demographic models evaluated with  $\partial a \partial i^1$ . The**

Log-likelihood value is indicated under each model.

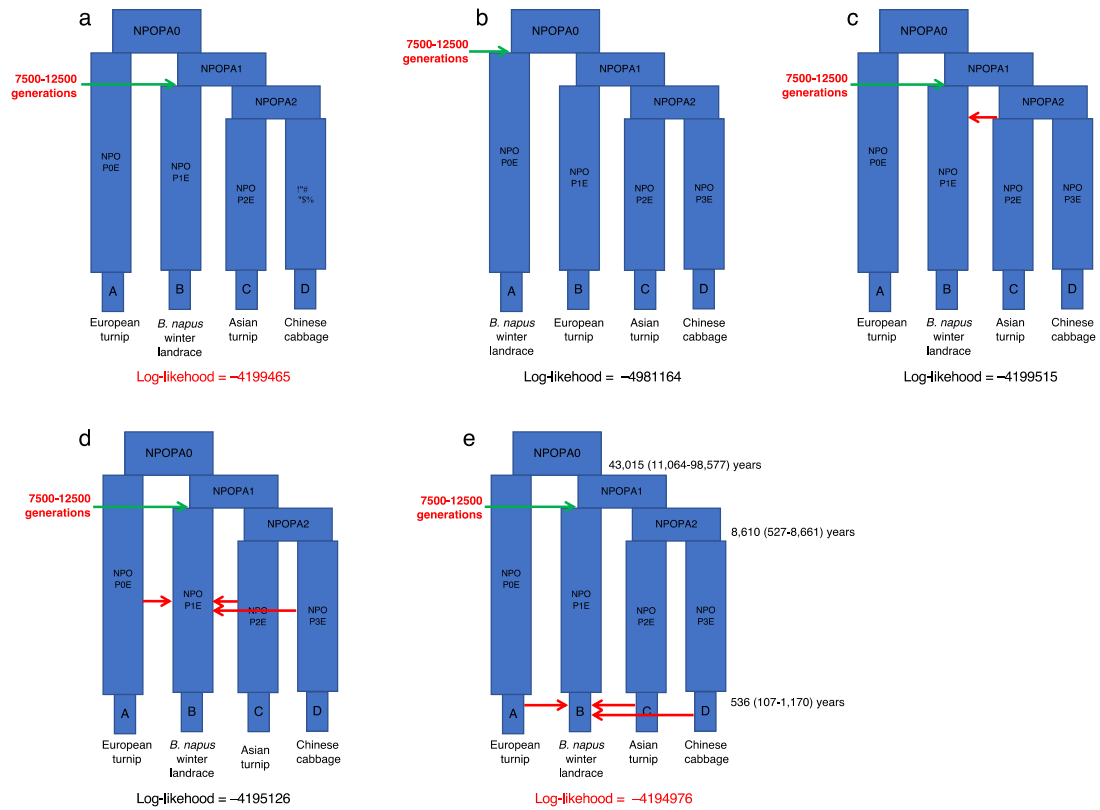

**Supplementary Figure 3. The demographic history of the A subgenome of *B. napus*.** The Log-likelihood value is indicated under each model. All the red lines indicate the migration events from *B. rapa* into the *B. napus* winter landraces. The generation number of *B. napus* was set to 7500 to 12500<sup>2</sup>. The divergence time for different split events was estimated using fastsimcoal2<sup>3</sup>, and marked on the right of the corresponding event. Three deduced ancient populations were marked as NPOPA0 to NPOPA2.

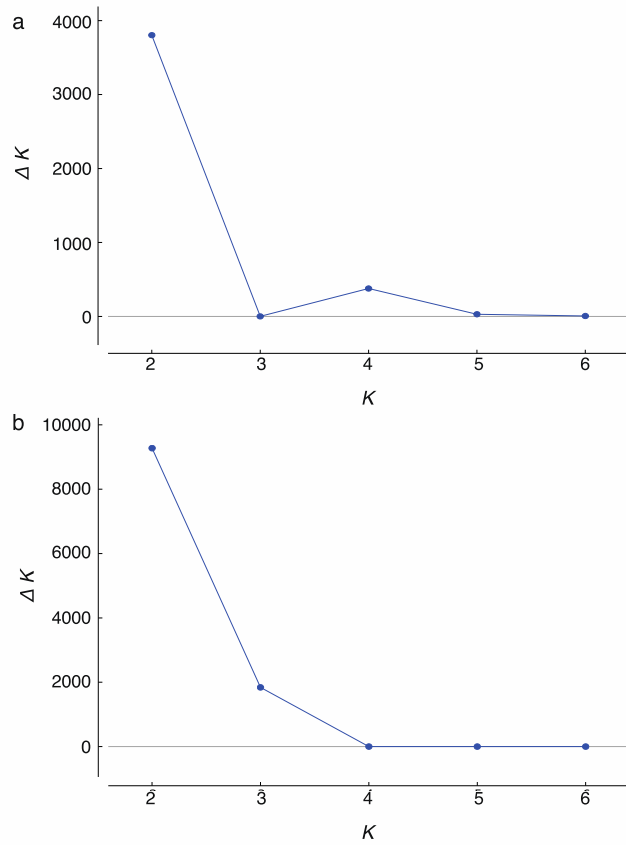

**Supplementary Figure 4.  $\Delta K$  based on rate of change of  $\text{LnP}(K)$  between successive  $K$  values.** (a) Comparison of  $\Delta K$  for population structure of *B. napus* landraces and *B. rapa* accessions; (b) comparison of  $\Delta K$  for population structure of *B. napus* landraces and *B. oleracea* accessions.

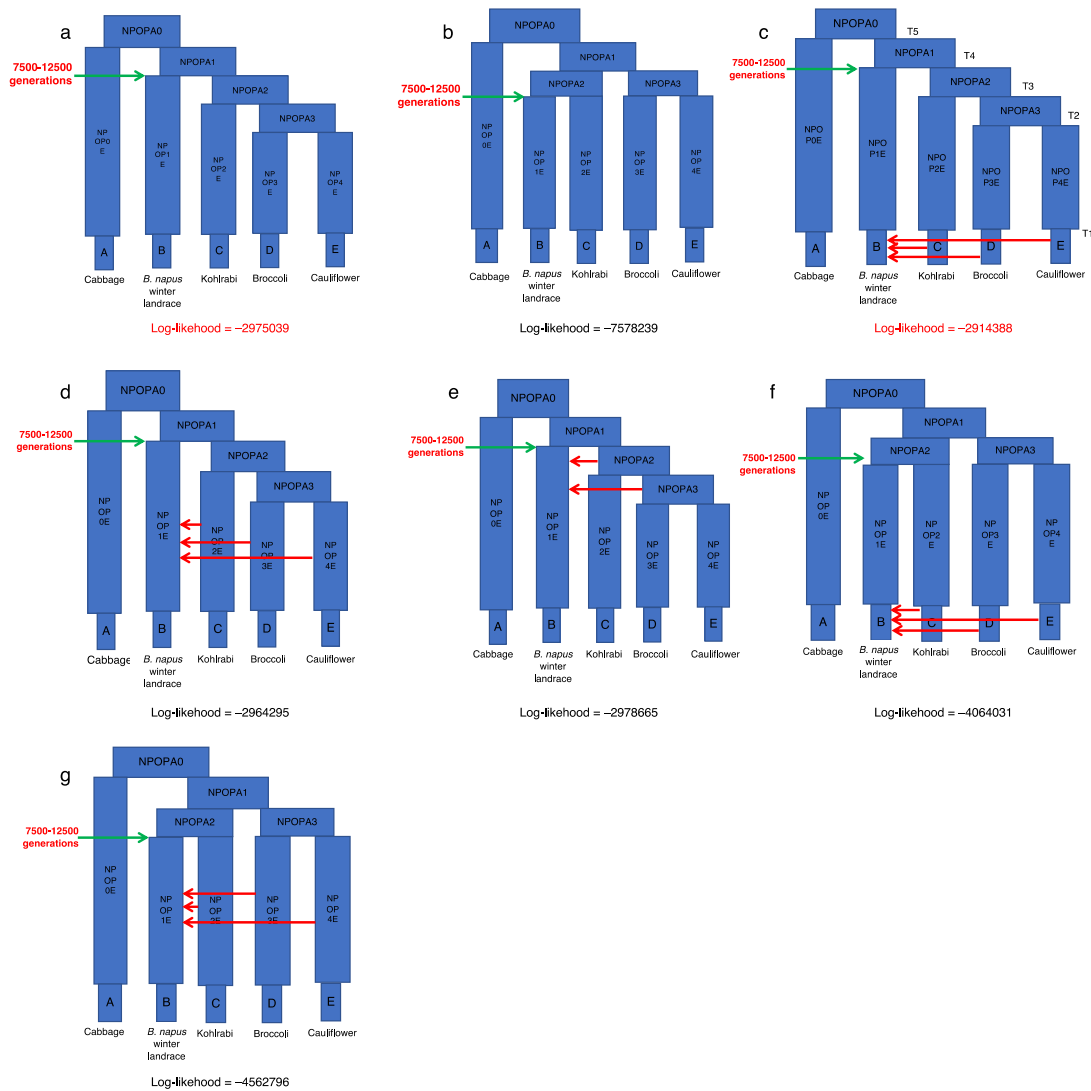

**Supplementary Figure 5. Comparison of different demographic models of the C subgenome of *B. napus*.** The Log-likelihood value is indicated under each model. No migration was considered in a and b. Recent migration from *B. oleracea* into the *B. napus* landraces was considered in models c and f; middle-term migration from *B. oleracea* into *B. napus* landraces was considered in models d and g; long-term migration from *B. oleracea* into *B. napus* landraces was considered in model e. The generation number of *B. napus* was set to 7500 to 12500<sup>2</sup>. All the red lines indicate the migration events. Four deduced ancient populations were marked as NPOPA0 to NPOPA3.

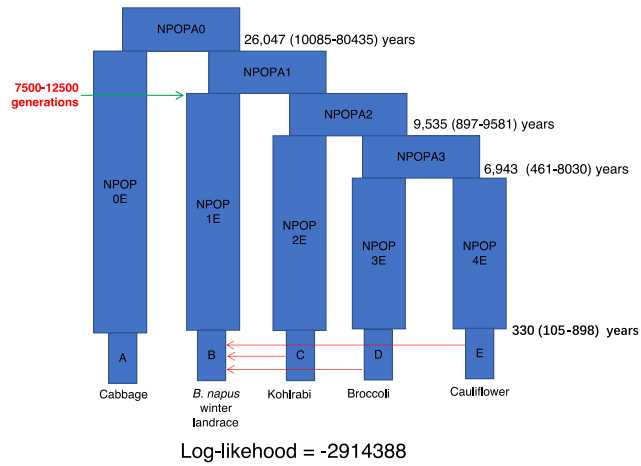

**Supplementary Figure 6. The demographic history of the C subgenome of *B. napus*.** The Log-likelihood value is indicated under the model. All the red lines indicate the recent migration events from *B. oleracea* into the *B. napus* landraces. The generation number of *B. napus* was set to 7500 to 12500<sup>2</sup>. The divergence time for different split events was estimated using fastsimcoal2<sup>3</sup> and marked on the right of the corresponding event. Four deduced ancient populations were marked as NPOPA0 to NPOPA3.

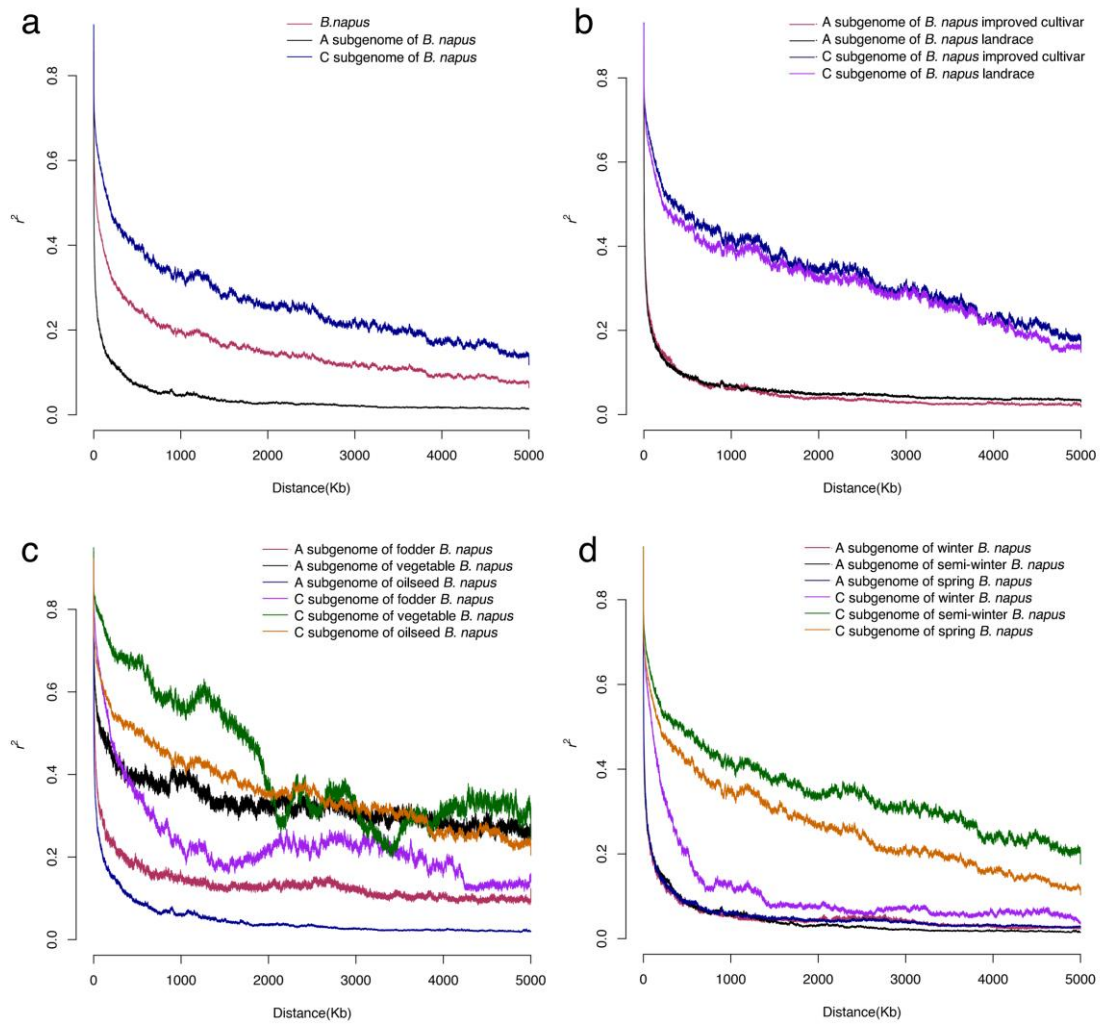

**Supplementary Figure 7. Comparison of LD decay at the genome- and subgenome-wide level.** (a) Comparison of genome- and subgenome-wide LD decay for the *B. napus* accessions. The LD decay from the A and C subgenomes is indicated by black and red lines, respectively, and that from the *B. napus* genome is indicated in blue. (b) Comparison of subgenome-wide LD decay for *B. napus* landraces and improved cultivars. The LD decay from the A and C subgenomes of *B. napus* landraces is indicated by black and blue-violet lines, and that from *B. napus* improved cultivars is indicated by red and navy blue lines, respectively. (c) Comparison of subgenome-wide LD decay for *B. napus* with different uses. The LD decay from the



A subgenome of *B. napus* accessions cultivated for fodder, vegetable, and oil purposes is indicated by red, black, and navy blue lines, and that from the C subgenome is indicated by blue-violet, dark green, and brown lines, respectively. (d) Comparison of subgenome-wide LD decay for *B. napus* with different ecotypes. The LD decay from the A subgenome of *B. napus* for winter, semi-winter, and spring ecotypes is indicated by red, black, and navy blue lines, and that from the C subgenome by blue-violet, dark green, and brown lines, respectively. The LD decay of different groups of accessions was calculated using the Bna SNP set.

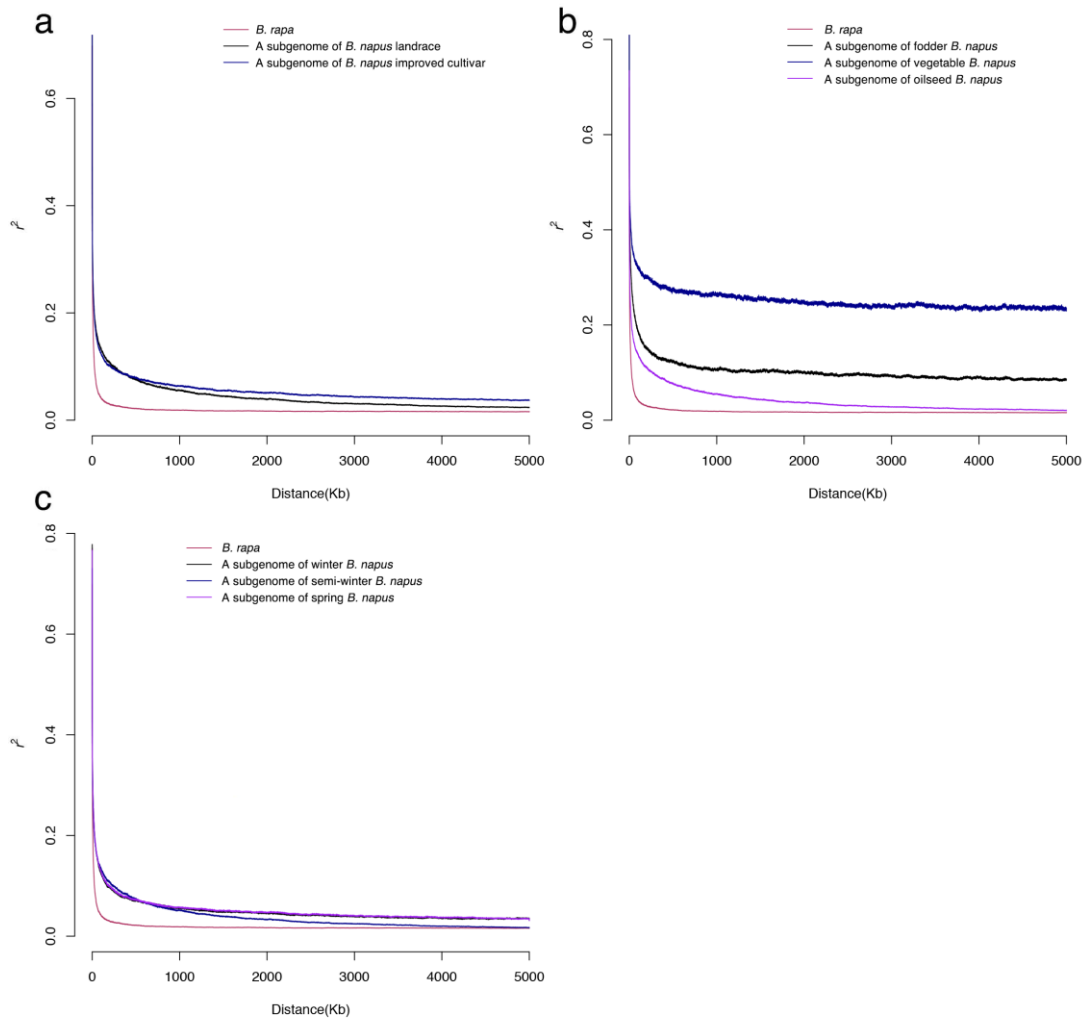

**Supplementary Figure 8. Comparison of LD decay based on BraA SNP sets.** (a) LD decay of *B. rapa*, and the A subgenomes of *B. napus* landraces and improved cultivars. (b) LD decay of *B. rapa*, and the A subgenomes of *B. napus* with oil, vegetable, and fodder purposes, respectively. (c) LD decay of *B. rapa*, and the A subgenomes of *B. napus* with winter, semi-winter, and spring ecotypes, respectively. The LD decay of different groups of accessions was calculated using the BraA SNP set.

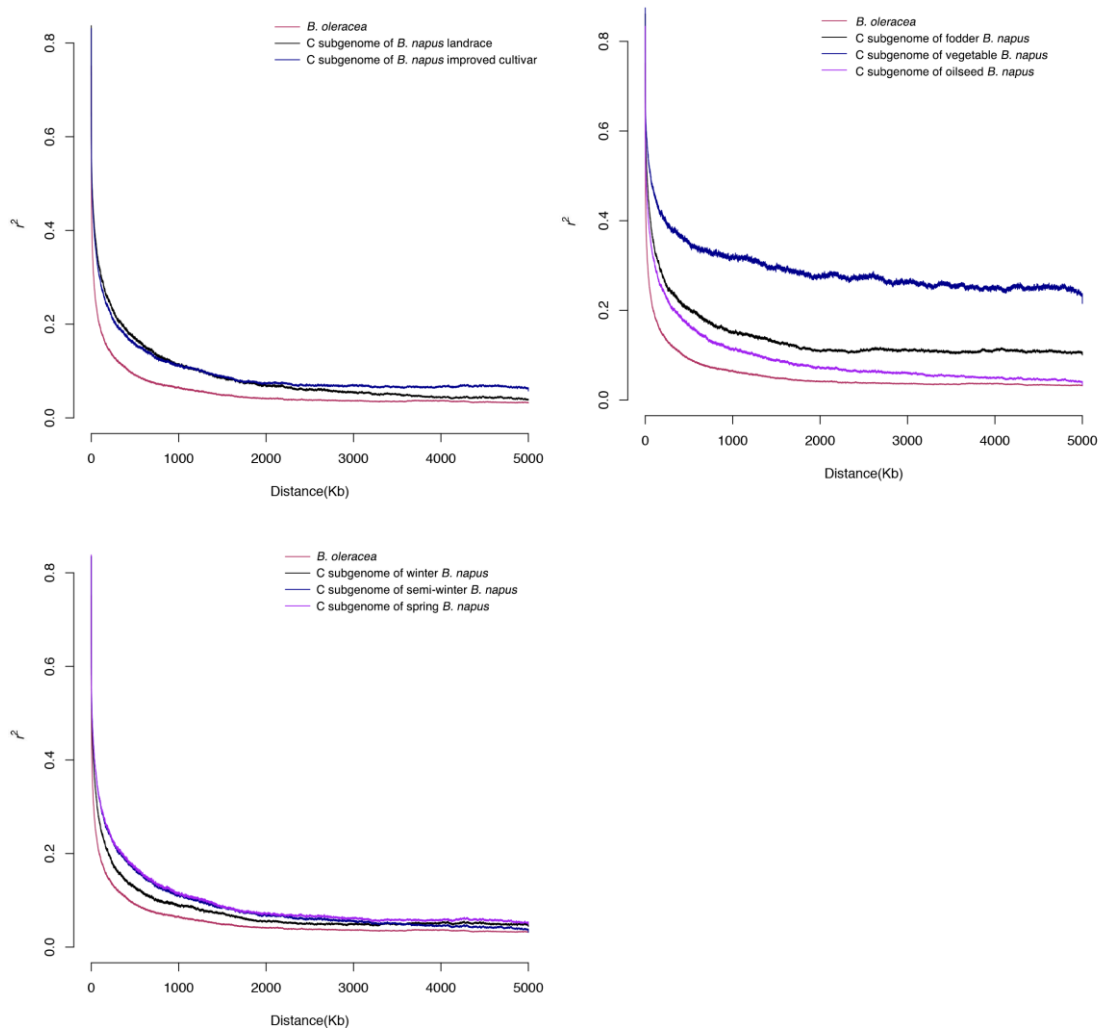

**Supplementary Figure 9. Comparison of LD decay based on BolC SNP sets.** (a) LD decay of *B. oleracea*, and the C subgenomes of *B. napus* landraces and improved cultivars. (b) LD decay of *B. oleracea*, and the C subgenomes of *B. napus* with oil, vegetable, and fodder purposes, respectively. (c) LD decay of *B. oleracea*, and the C subgenomes of *B. napus* with winter, semi-winter, and spring ecotypes, respectively. The LD decay of different groups of accessions was calculated using the BolC SNP set.

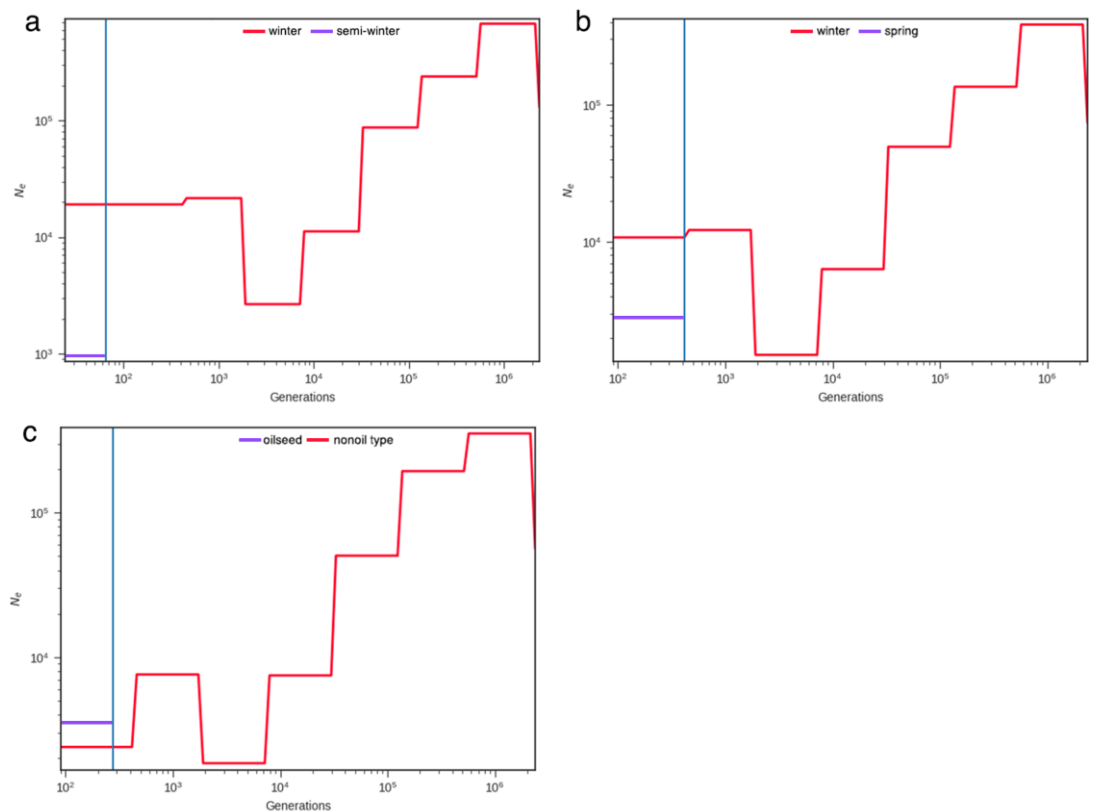

**Supplementary Figure 10. Divergence history of different ecotype and usage of *B.***

*napus*. (a) Divergence between *B. napus* winter and semi-winter ecotype; (b)

Divergence between *B. napus* winter and spring ecotype; (c) Divergence between

oilseed and non-oilseed (Combined fodder and vegetable accessions) *B. napus*. The

historical effective population sizes ( $N_e$ ) and divergence time were estimated using

SMC++<sup>4</sup>. Generation estimates were inferred by assuming that the upper and lower

mutation rates were  $1.5 \times 10^{-8}$  and  $9 \times 10^{-9}$  per synonymous site per generation,

respectively, and that the generation time was one year.

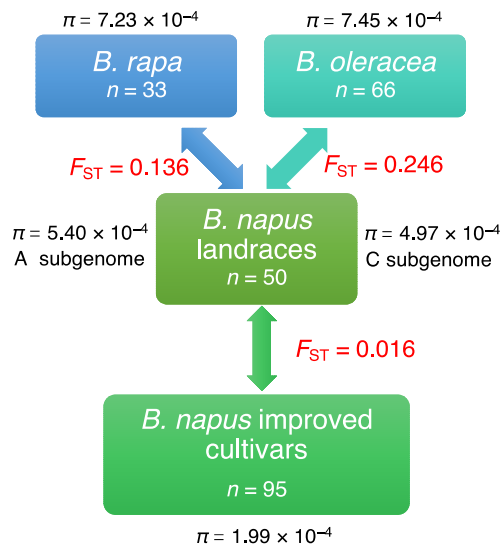

**Supplementary Figure 11. Genome- and subgenome-wide comparison of nucleotide diversity and  $F_{ST}$  during the FSI and SSI of *B. napus*.**

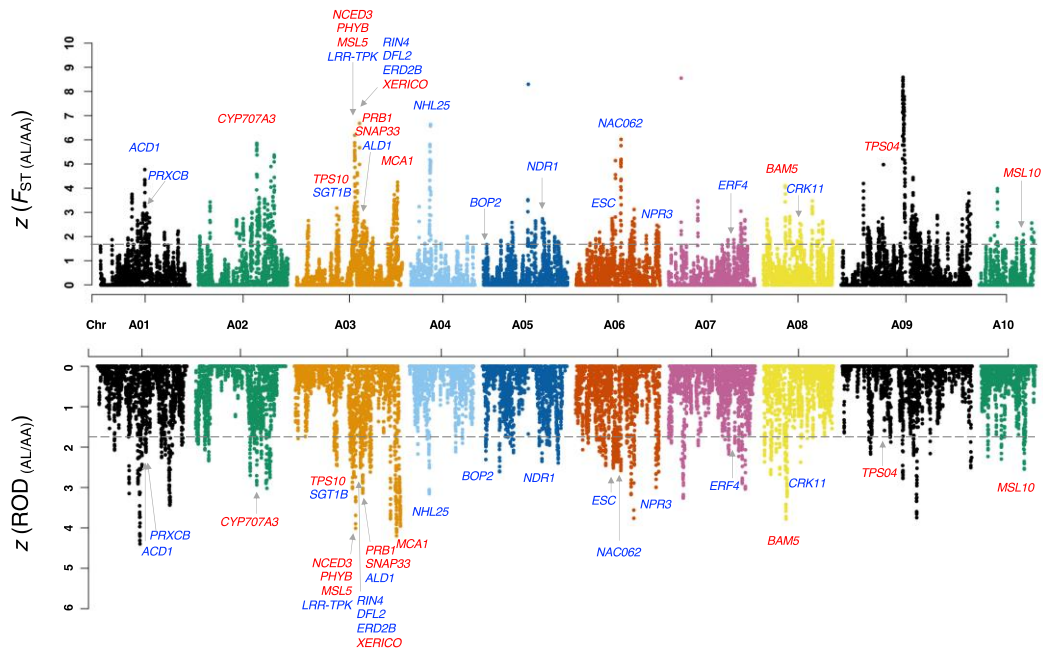

**Supplementary Figure 12. Whole-genome analysis of the selection signatures in A subgenome during the FSI of *B. napus*.** The upper and lower panels show the genome-wide screening of FSI-selection signals of  $F_{ST} (AL/AA)$  and  $ROD (AL/AA)$ , respectively. Horizontal dashed lines show the significance level of  $\alpha = 0.05$ , corresponding to  $z = 1.645$ . Genes involved in abiotic response are labeled in red; disease defense response genes are labeled in blue. Full descriptions of these genes are shown in Supplementary Data 29.

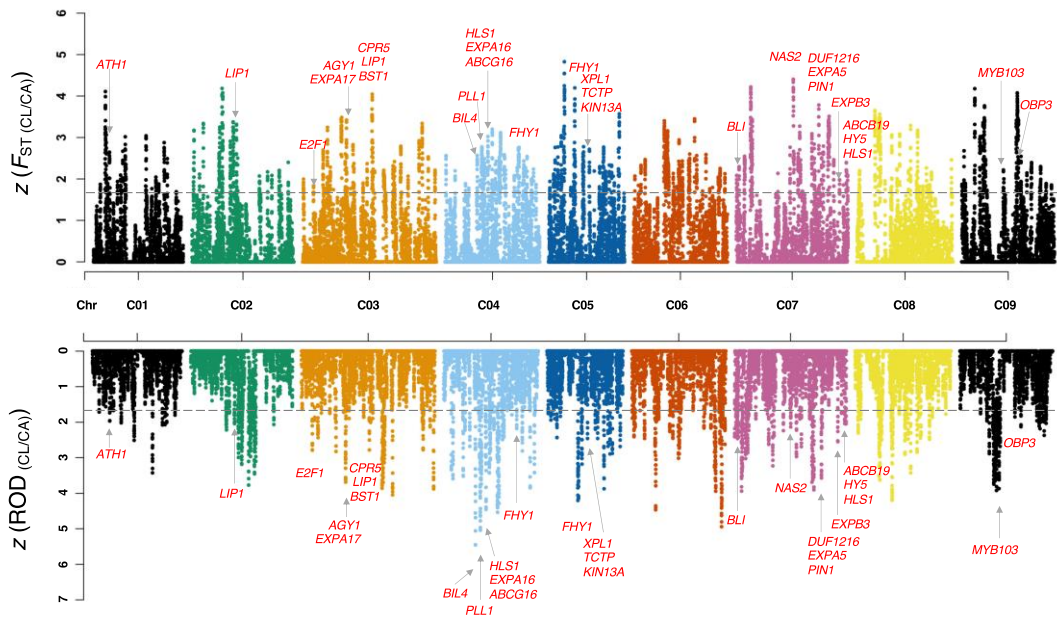

**Supplementary Figure 13. Whole-genome analysis of the selection signatures in C subgenome during the FSI of *B. napus*.** The upper and lower panels show the genome-wide screening of FSI-selection signals of  $F_{ST} (CL/CA)$  and  $ROD (CL/CA)$ , respectively. Horizontal dashed lines show the significance level of  $\alpha = 0.05$ , corresponding to  $z = 1.645$ . Genes involved in morphogenesis are labeled in red. Full descriptions of these genes are shown in Supplementary Data 29.

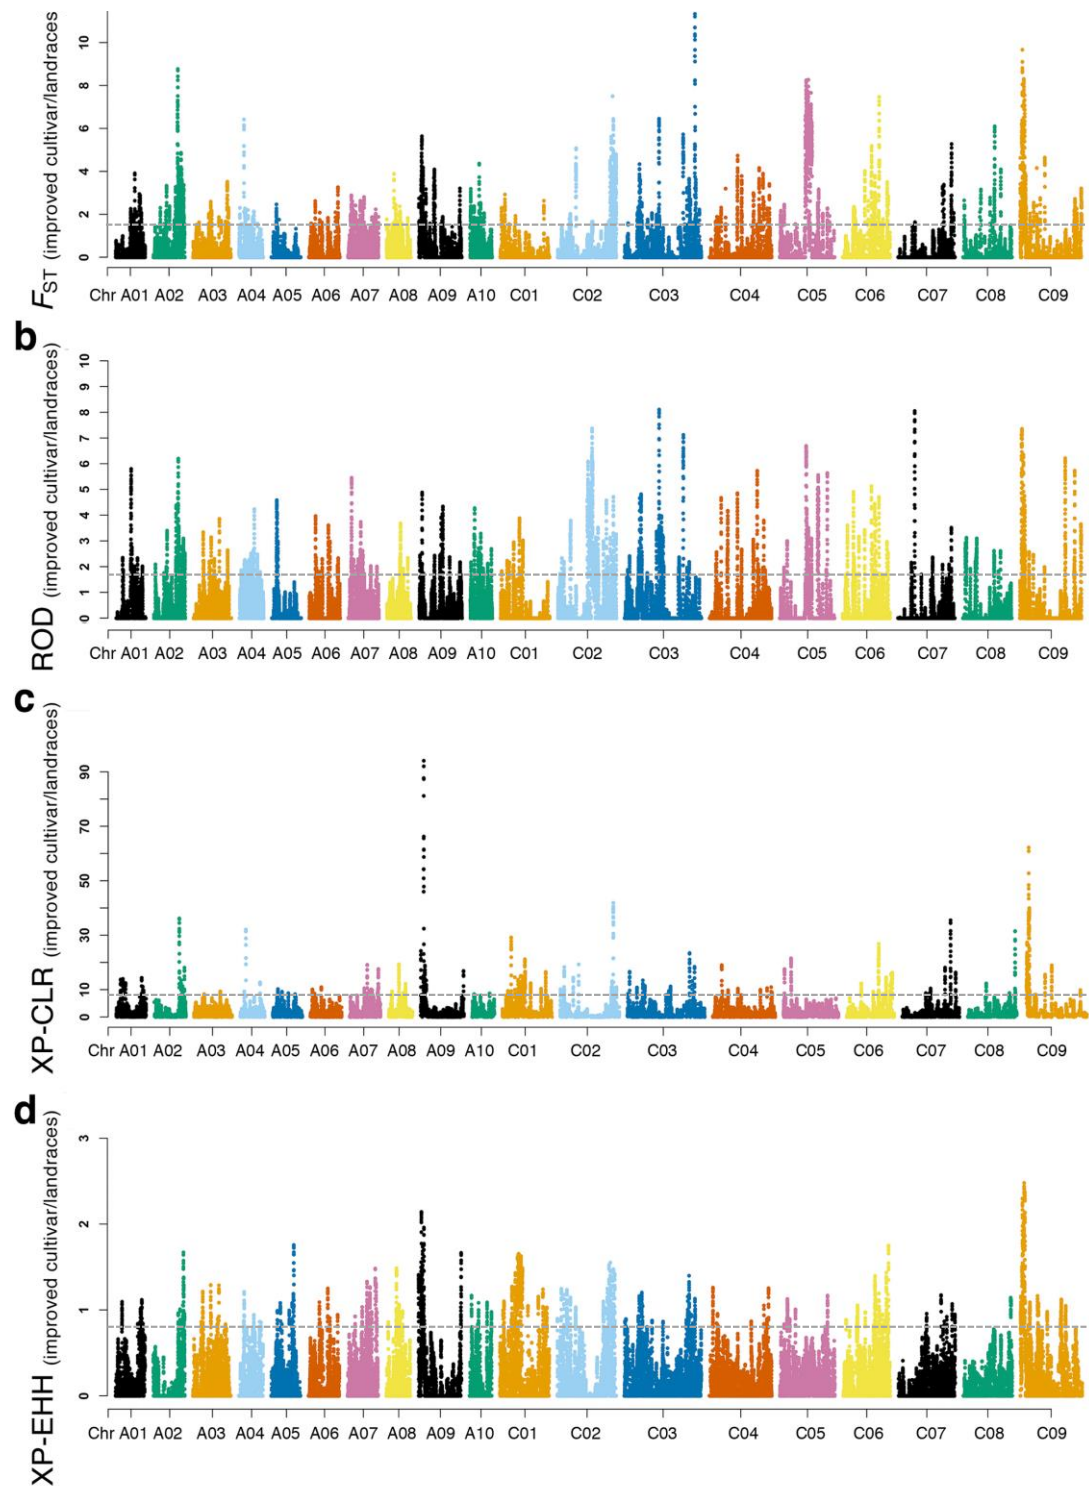

**Supplementary Figure 14. Whole-genome scanning of the improvement-selection signatures between *B. napus* improved cultivars and landraces.** Improvement-selection signals detected using (a)  $F_{ST}$ , (b) ROD, (c) XPCLR, and (d) XP-EHH comparisons.



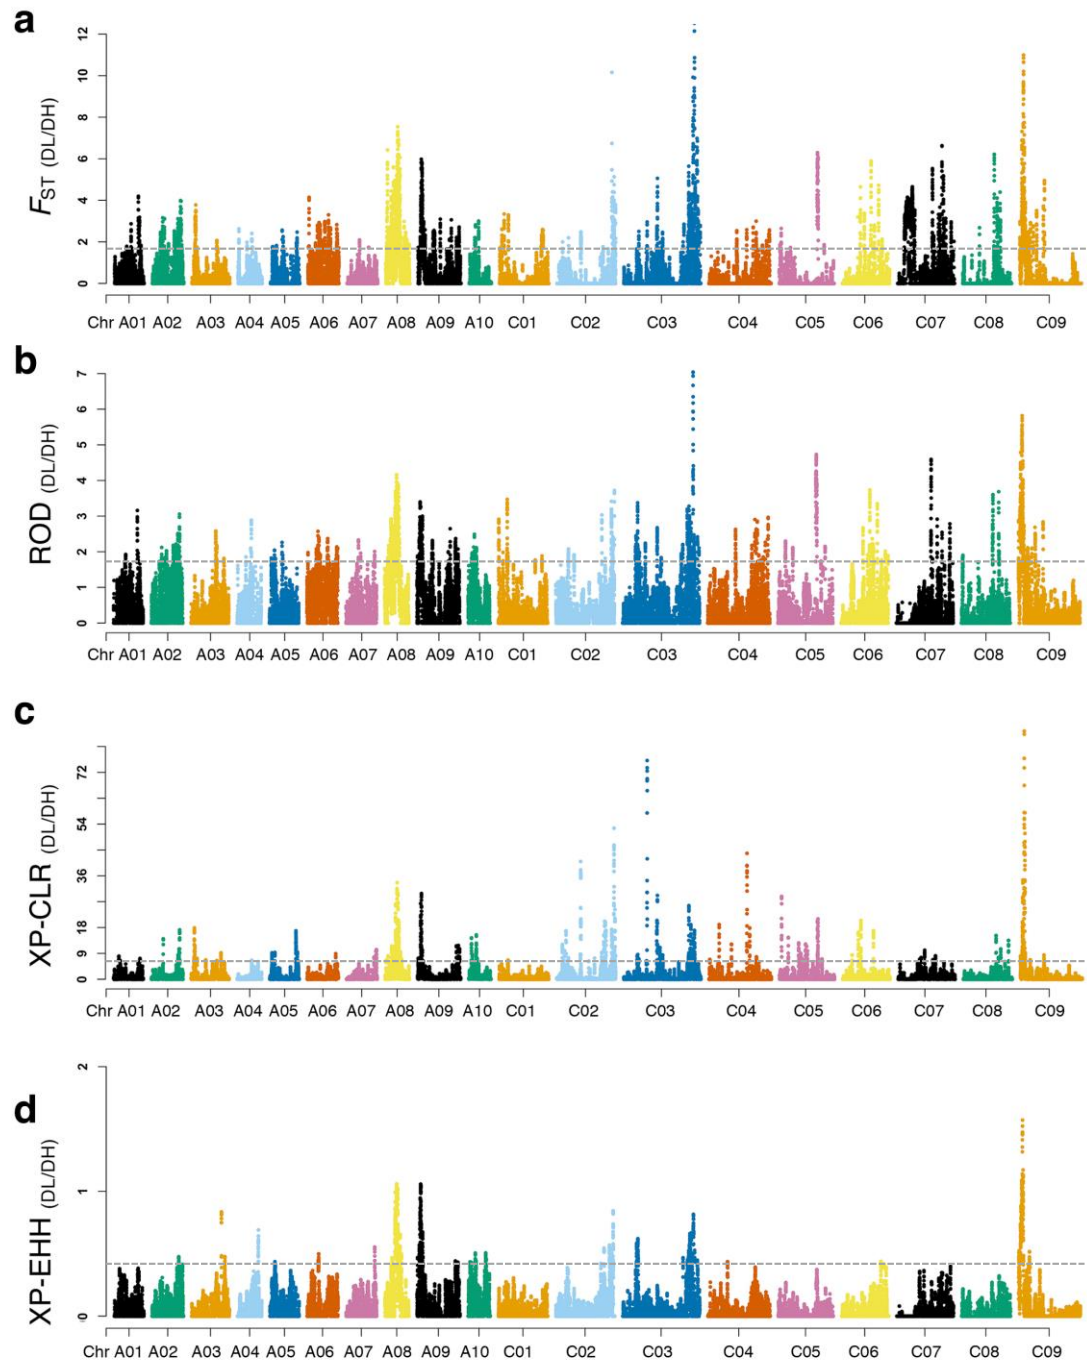

**Supplementary Figure 15. Whole-genome scanning of the improvement-selection signatures between double-low (DL) and double high (DH) *B. napus* cultivars.**

Improvement-selection signals detected using (a)  $F_{ST}$ , (b) ROD, (c) XPCLR, and (d) XP-EHH comparisons.

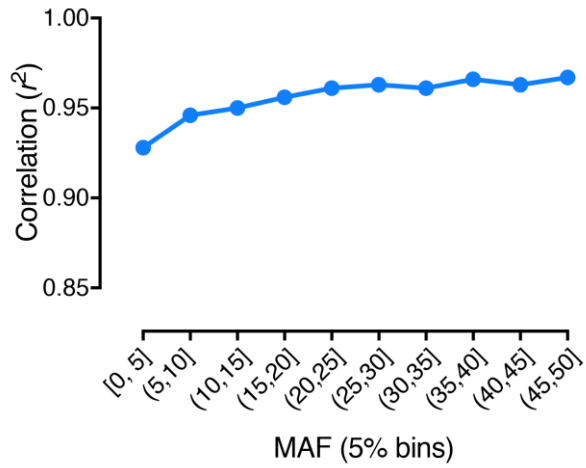

**Supplementary Figure 16. Evaluation of imputation accuracy.** Correlations ( $r^2$ ) between true and imputed genotypes were calculated at each locus for two biological replicates of 20 *B. napus* accessions in intervals of 5% of the MAF. Missing SNPs in the true genotypes were excluded when calculating the correlations.

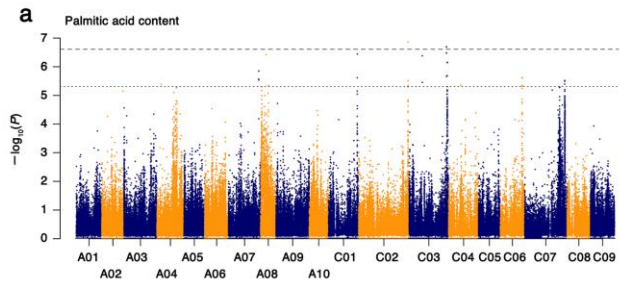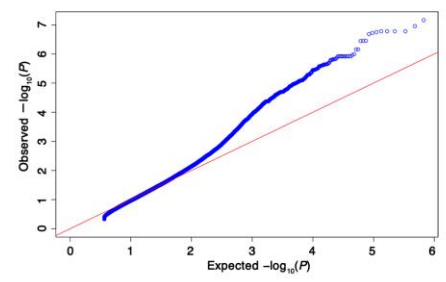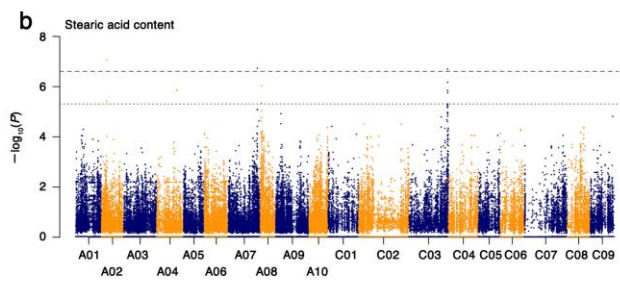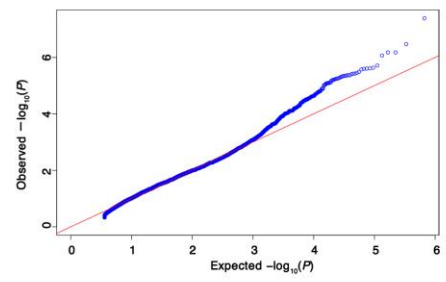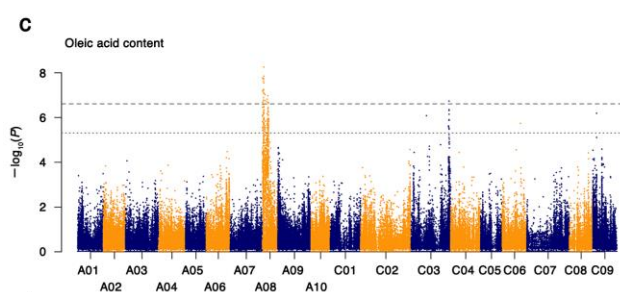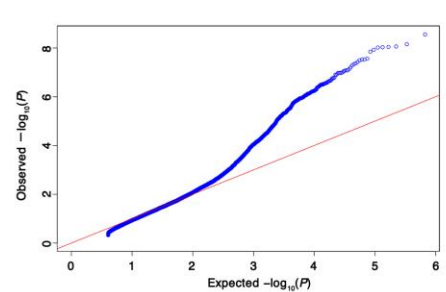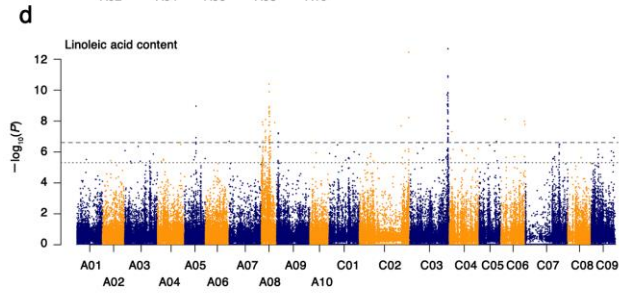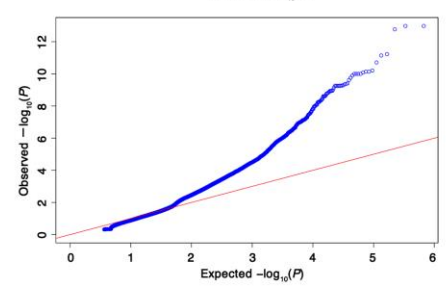

continued on next page

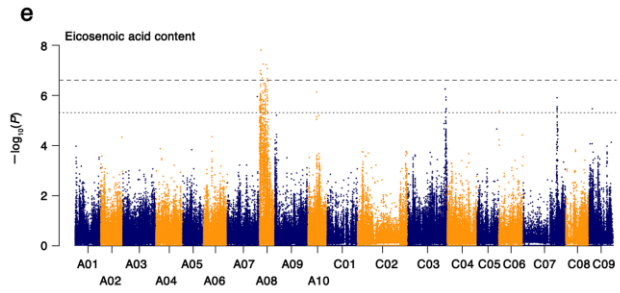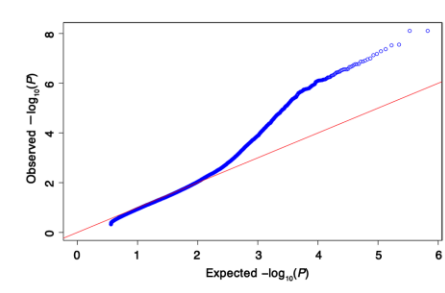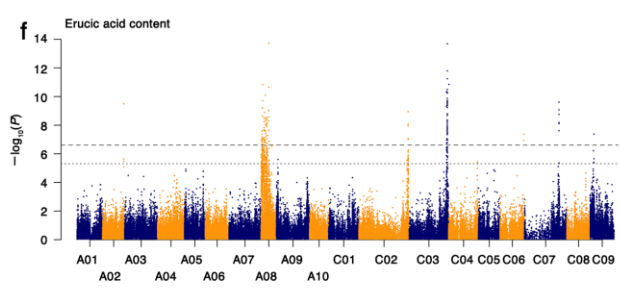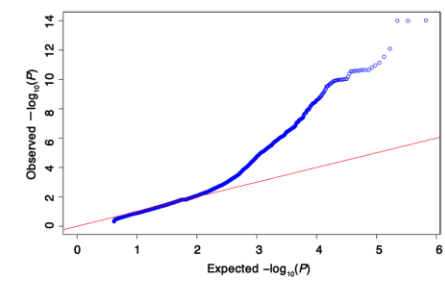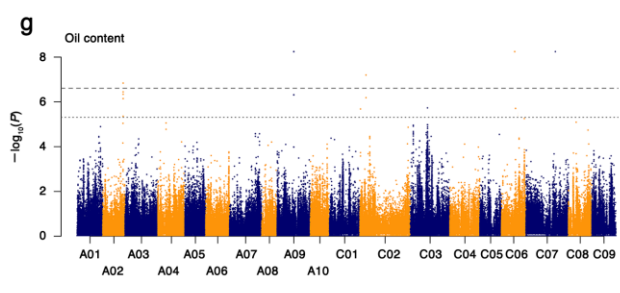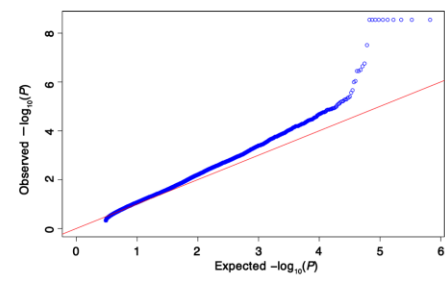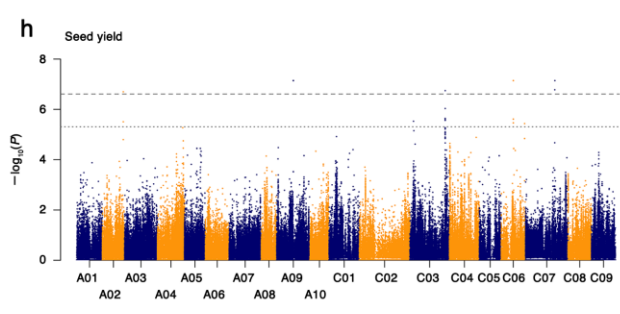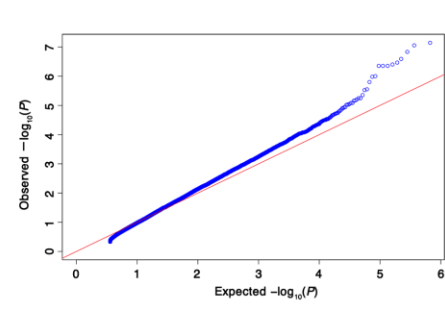

continued on next page

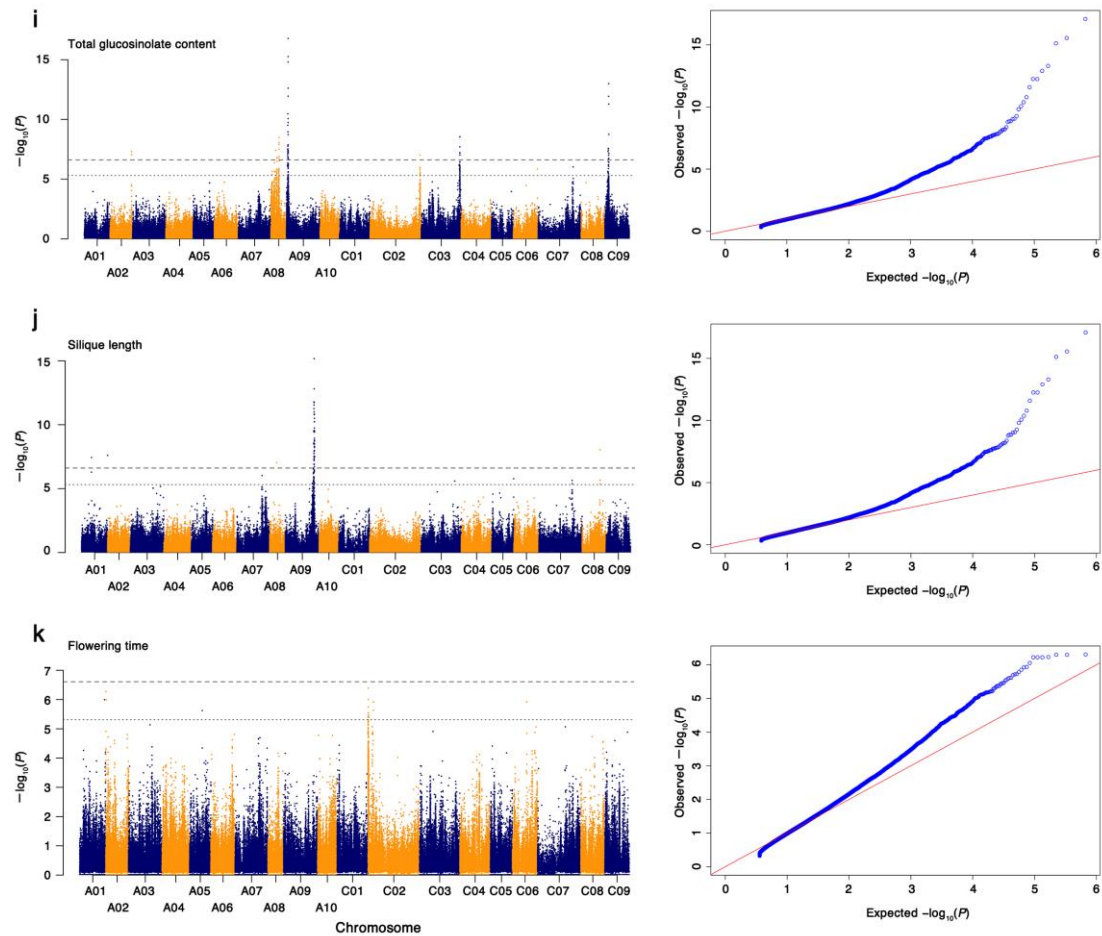

**Supplementary Figure 17. Manhattan and quantile-quantile (QQ) plots of GWAS for BLUP of 11 traits.** (a) Palmitic acid content; (b) stearic acid content; (c) oleic acid content; (d) linoleic acid content; (e) eicosenoic acid content; (f) erucic acid content; (g) oil content; (h) seed yield; (i) total glucosinolate content; (j) silique length; and (k) flowering time. The lower and upper dashed horizontal lines depict the suggestive ( $-\log_{10}(P) = 5.31$ ) and significance thresholds ( $-\log_{10}(P) = 6.61$ ), respectively.

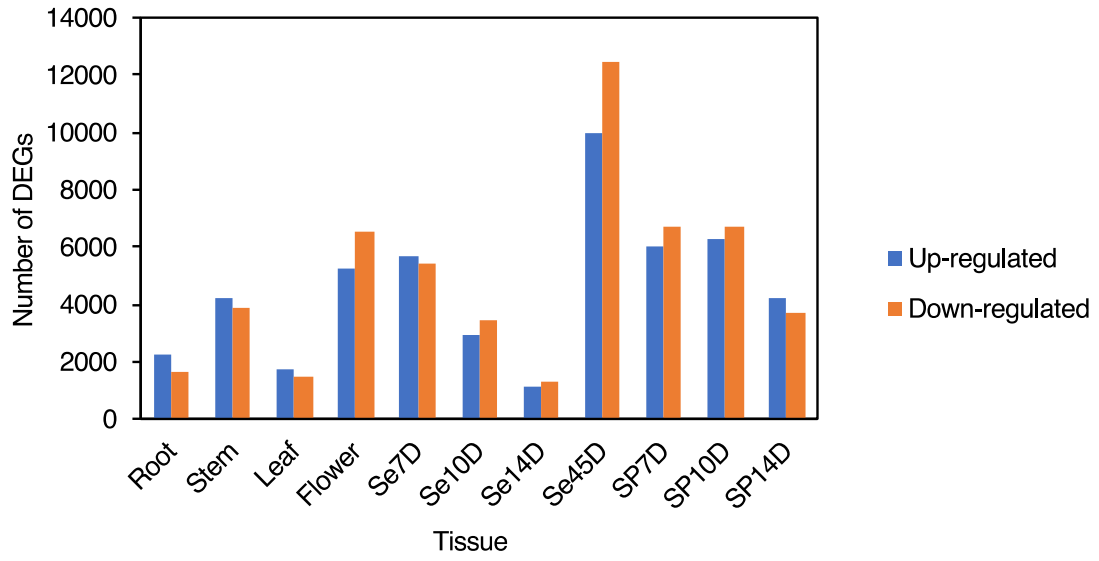

**Supplementary Figure 18. Number of DEGs in the indicated tissues between double-high and double-low *B. napus* accessions.**

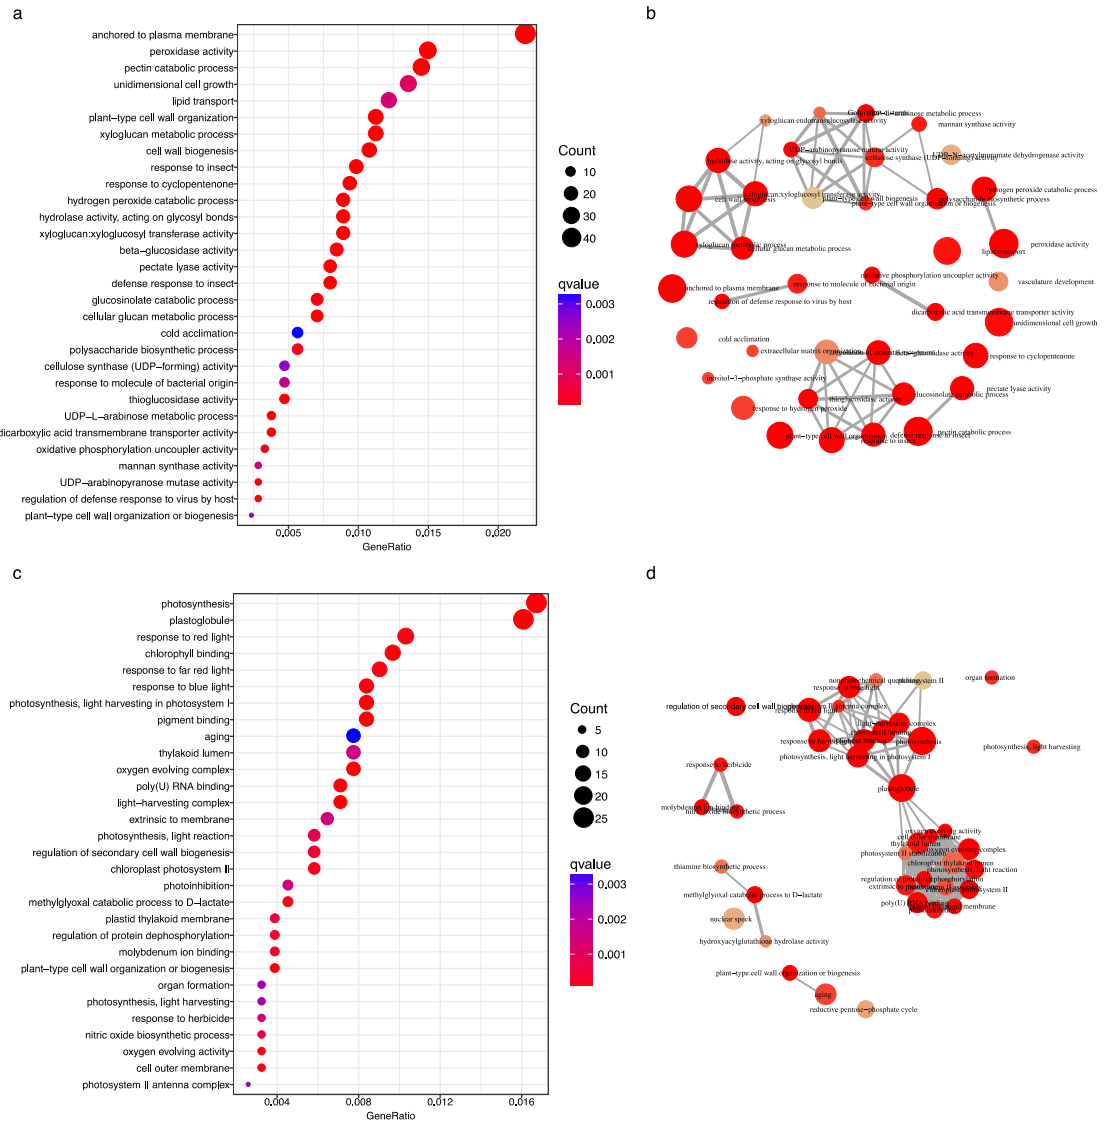

**Supplementary Figure 19. GO enrichment analysis results of DEGs between roots of double-high and double-low *B. napus* accessions. (a) and (c) Overrepresented GO terms in up- and down-regulated DEGs, respectively. (b) and (d) Enrichment results of up- and down-regulated DEGs, respectively. Only the top 30 significantly enriched GO terms were included in this figure.**







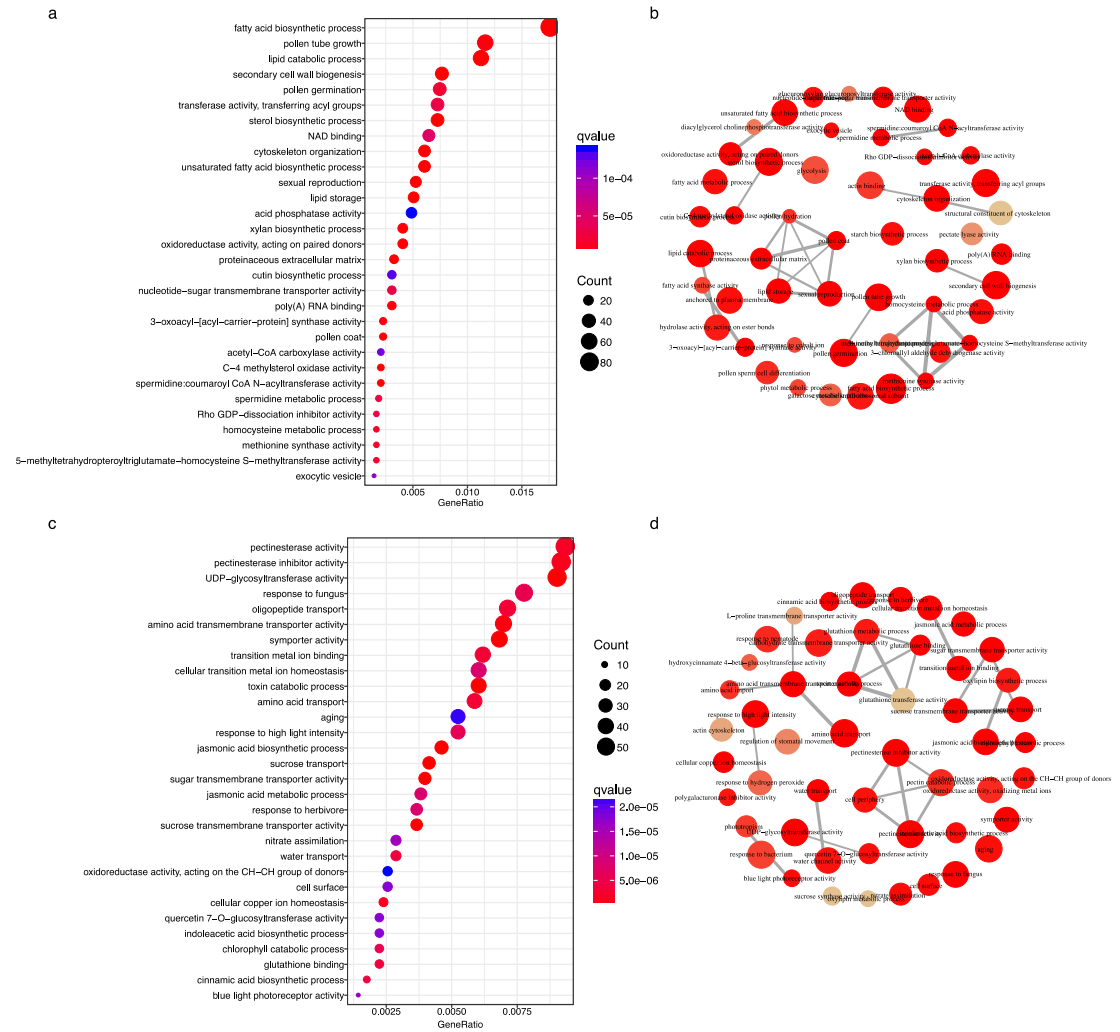

**Supplementary Figure 22. GO enrichment analysis results of DEGs between flowers of double-high and double-low *B. napus* accessions. (a) and (c) Overrepresented GO terms in up- and down-regulated DEGs, respectively. (b) and (d) Enrichment results of up- and down-regulated DEGs, respectively. Only the top 30 significantly enriched GO terms were included in this figure.**

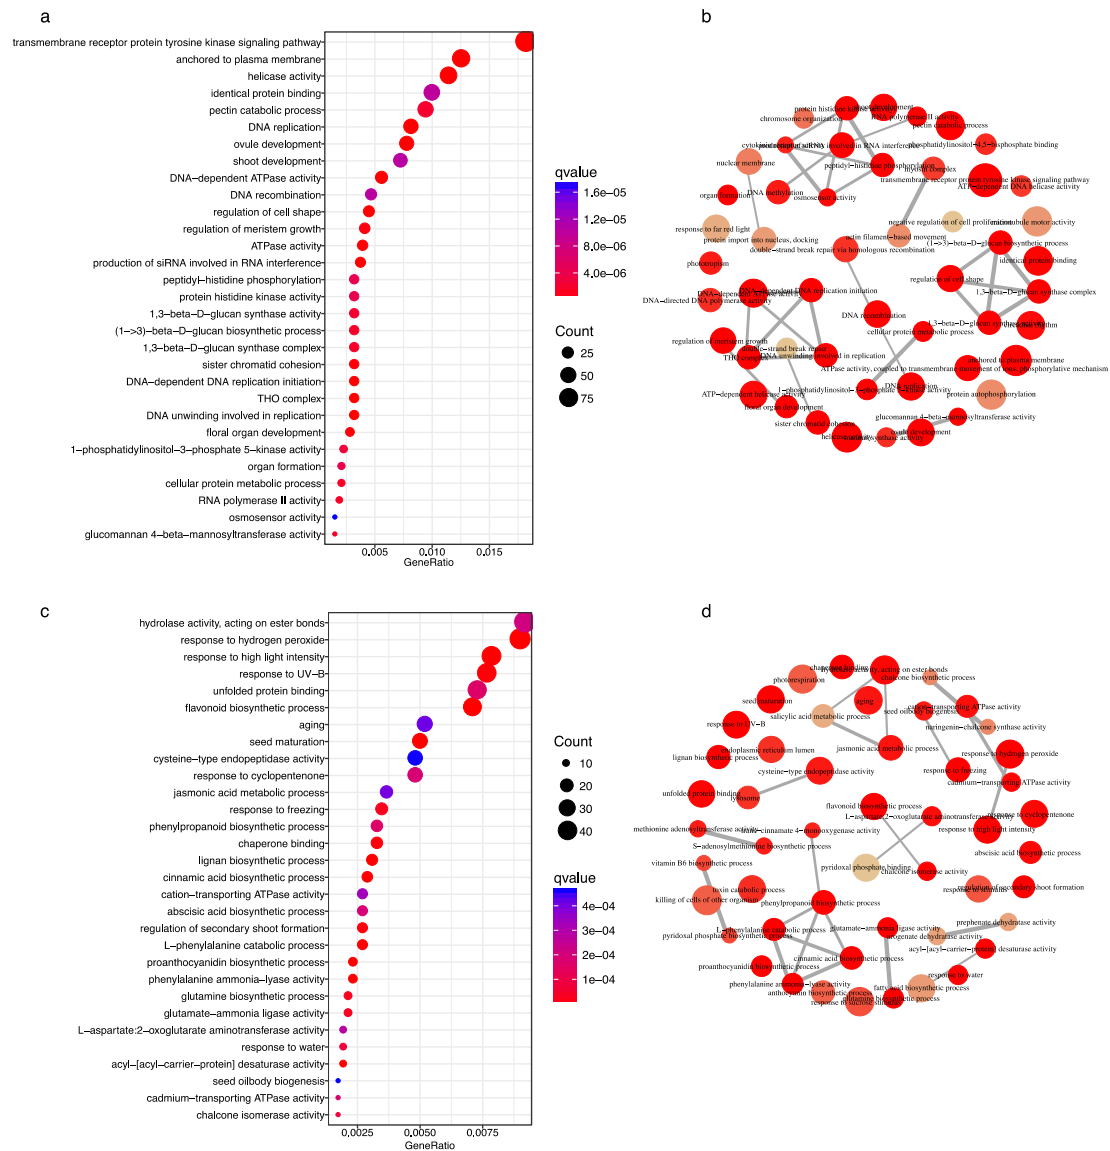

**Supplementary Figure 23. GO enrichment analysis results of DEGs between seeds at 7 days after flowering of double-high and double-low *B. napus* accessions.** (a) and (c) Overrepresented GO terms in up- and down-regulated DEGs, respectively. (b) and (d) Enrichment results of up- and down-regulated DEGs, respectively. Only the top 30 significantly enriched GO terms were included in this figure.

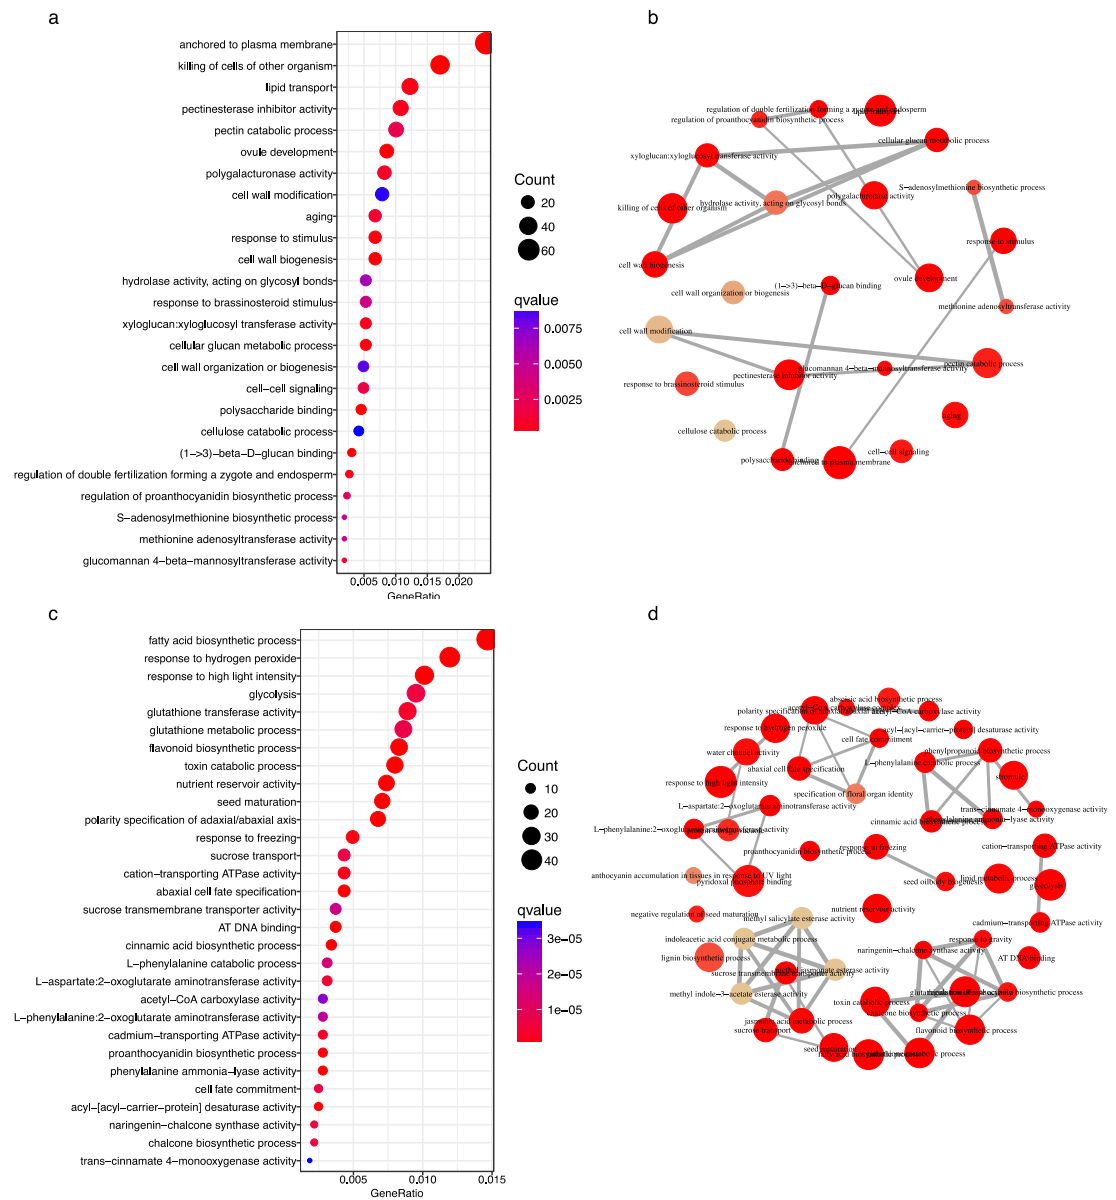

**Supplementary Figure 24. GO enrichment analysis results of DEGs between seeds at 10 days after flowering of double-high and double-low *B. napus* accessions.** (a) and (c) Overrepresented GO terms in up- and down-regulated DEGs, respectively. (b) and (d) Enrichment results of up- and down-regulated DEGs, respectively. Only the top 30 significantly enriched GO terms were included in this figure.

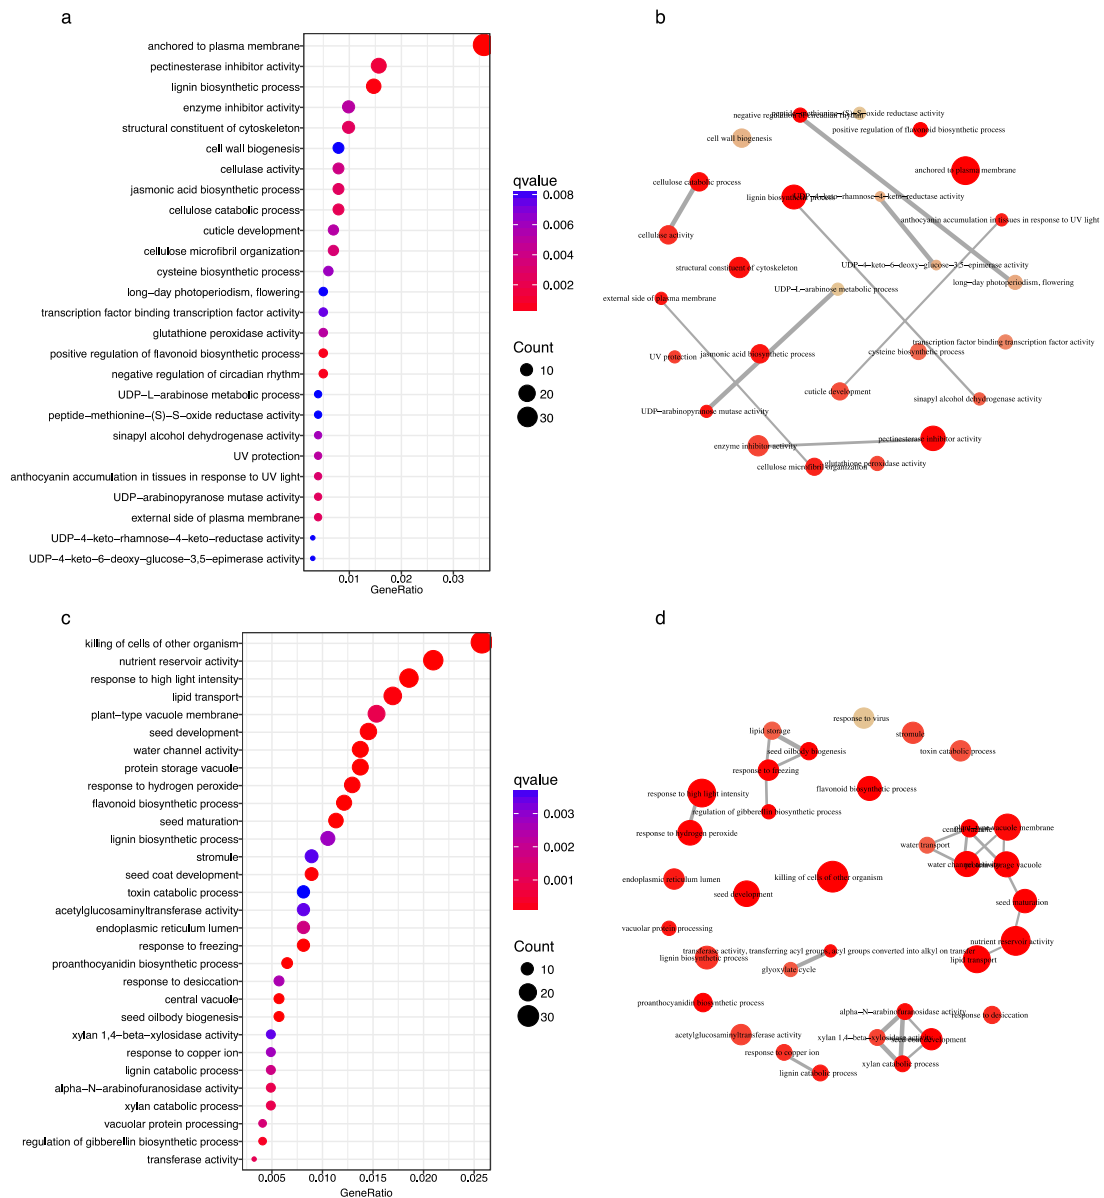

**Supplementary Figure 25. GO enrichment analysis results of DEGs between seeds at 14 days after flowering of double-high and double-low *B. napus* accessions. (a) and (c) Overrepresented GO terms in up- and down-regulated DEGs, respectively. (b) and (d) Enrichment results of up- and down-regulated DEGs, respectively. Only the top 30 significantly enriched GO terms were included in this figure.**

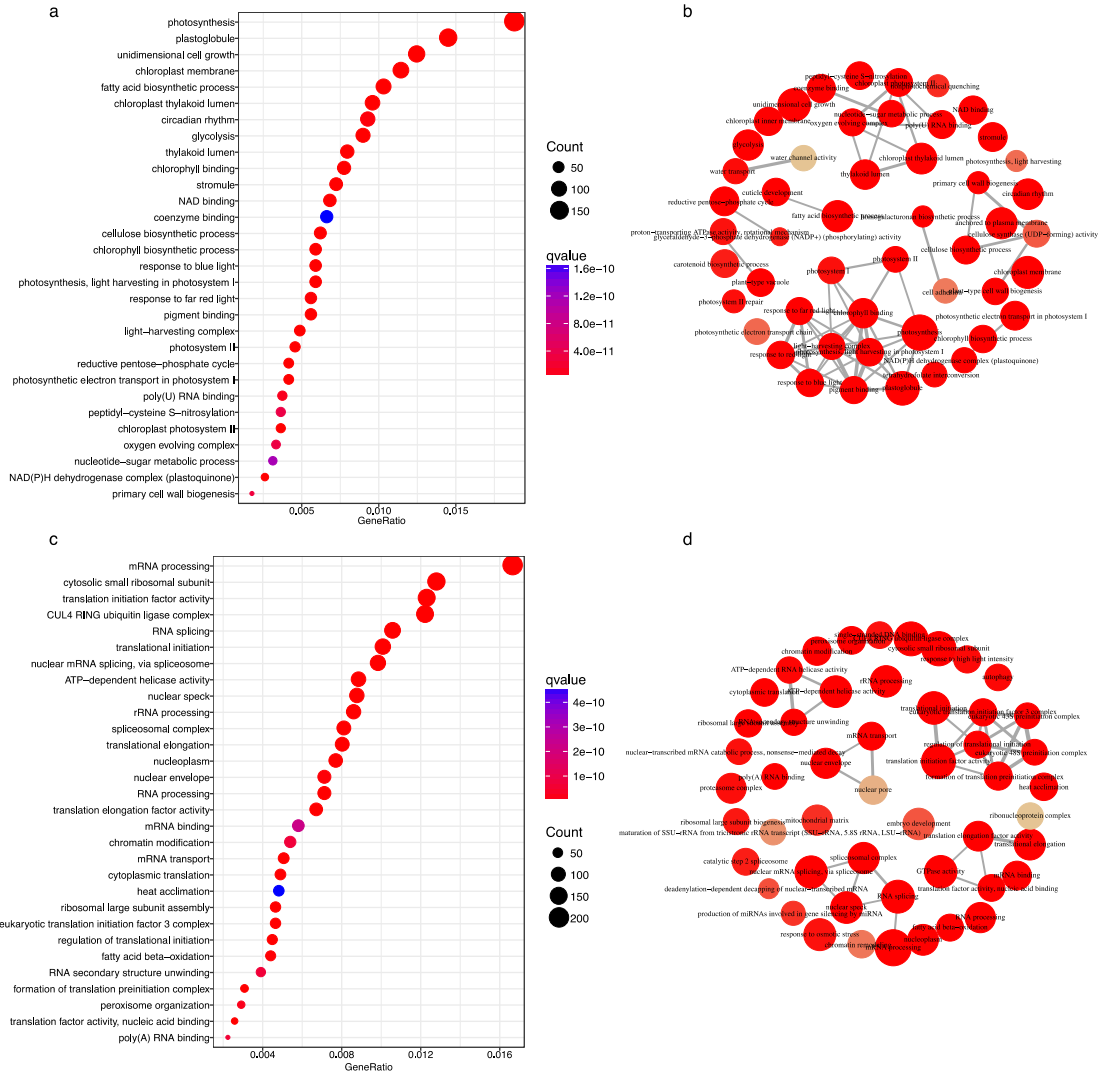

**Supplementary Figure 26. GO enrichment analysis results of DEGs between seeds at 45 days after flowering of double-high and double-low *B. napus* accessions. (a) and (c) Overrepresented GO terms in up- and down-regulated DEGs, respectively. (b) and (d) Enrichment results of up- and down-regulated DEGs, respectively. Only the top 30 significantly enriched GO terms were included in this figure.**

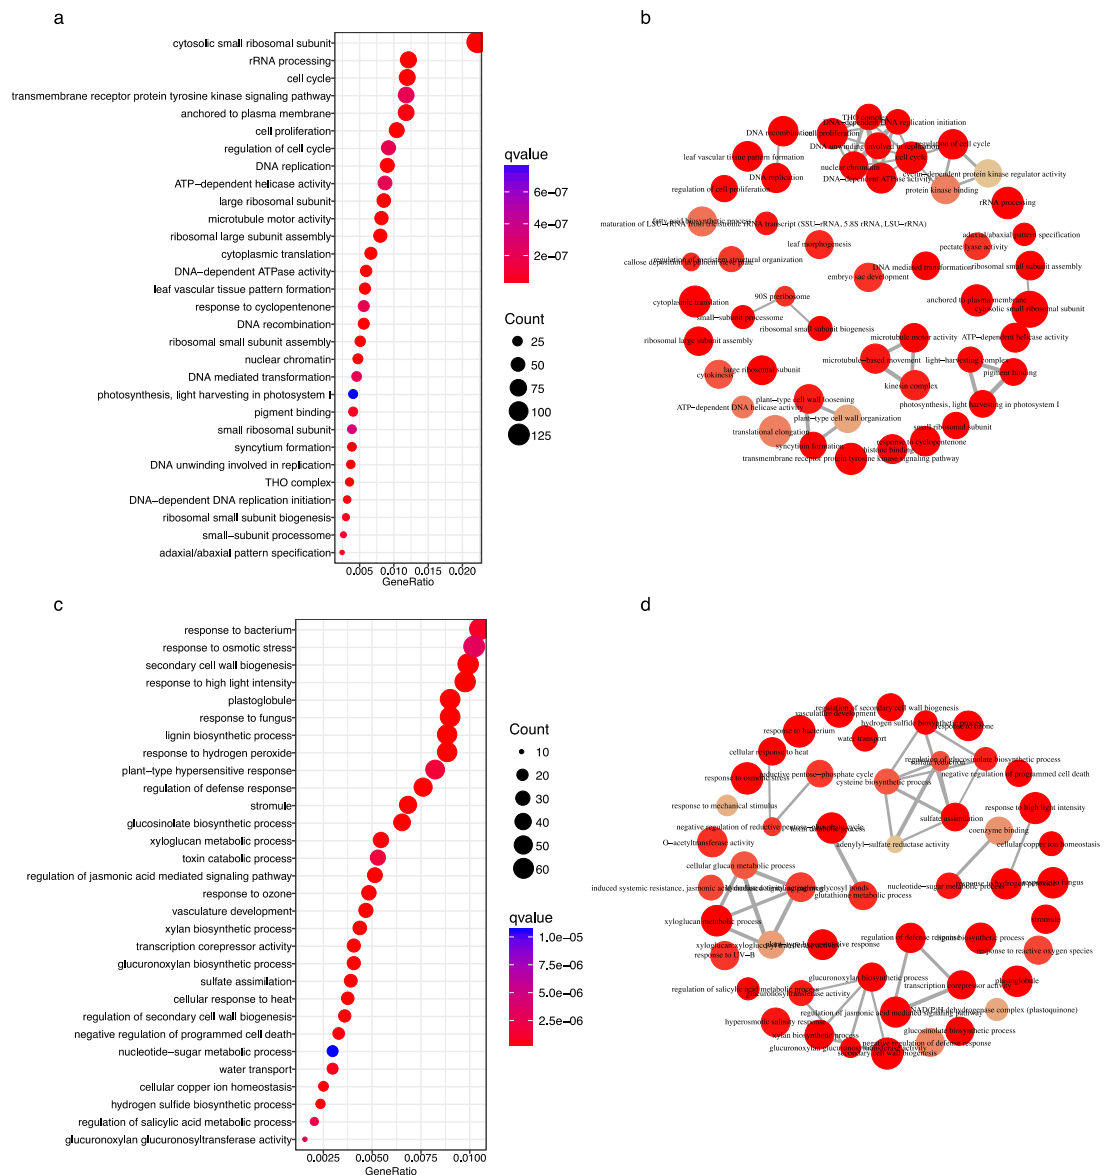

**Supplementary Figure 27. GO enrichment analysis results of DEGs between silique pericarps at 7 days after flowering of double-high and double-low *B. napus* accessions.** (a) and (c) Overrepresented GO terms in up- and down-regulated DEGs, respectively. (b) and (d) Enrichment results of up- and down-regulated DEGs, respectively. Only the top 30 significantly enriched GO terms were included in this figure.

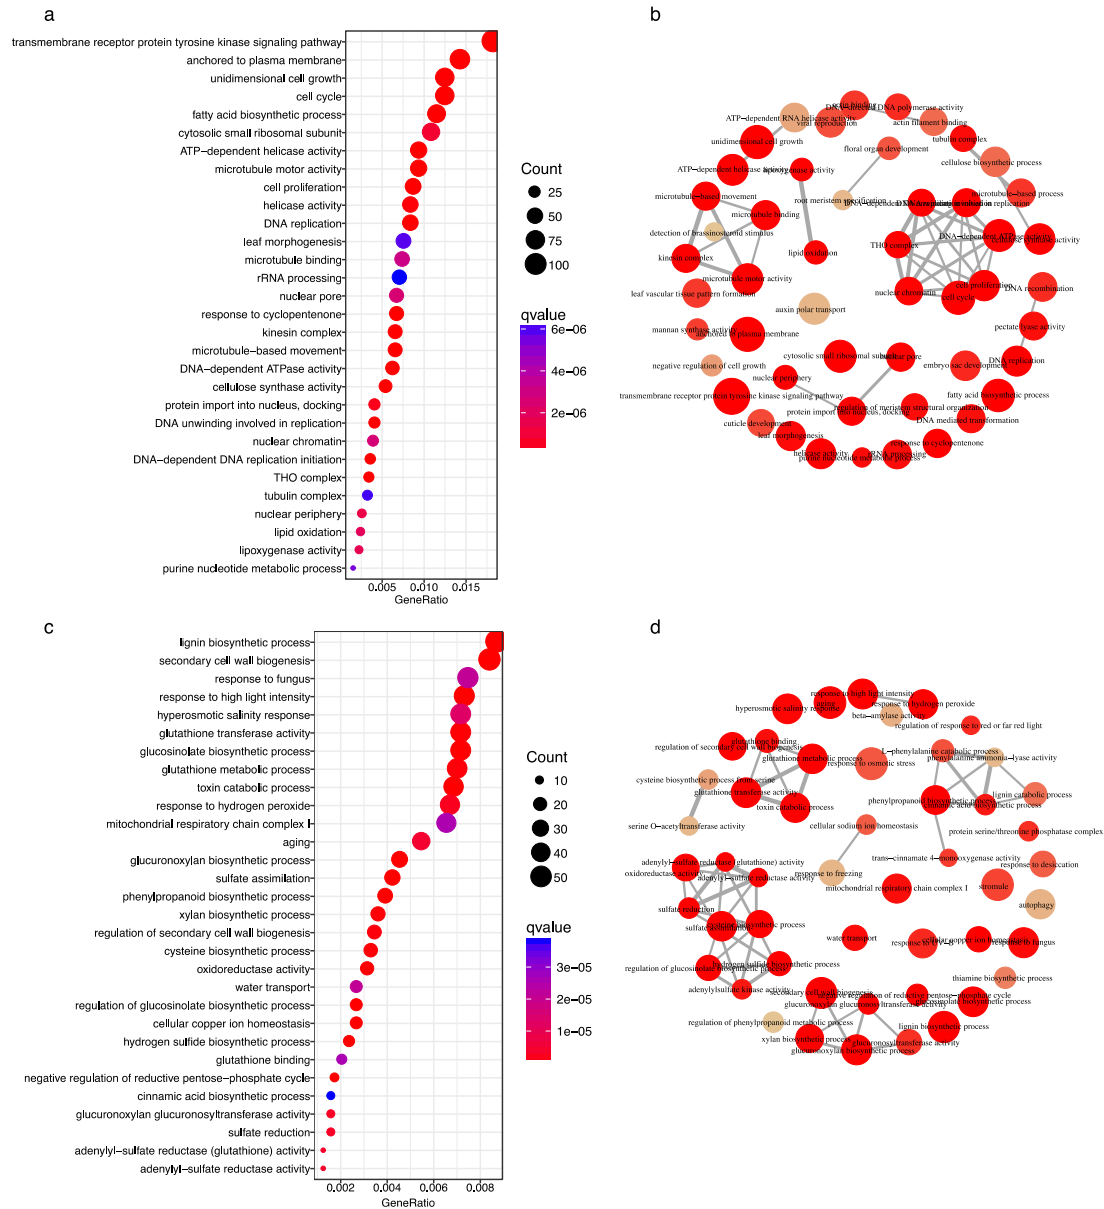

**Supplementary Figure 28. GO enrichment analysis results of DEGs between silique pericarps at 10 days after flowering of double-high and double-low *B. napus* accessions. (a) and (c) Overrepresented GO terms in up- and down-regulated DEGs, respectively. (b) and (d) Enrichment results of up- and down-regulated DEGs, respectively. Only the top 30 significantly enriched GO terms were included in this figure.**





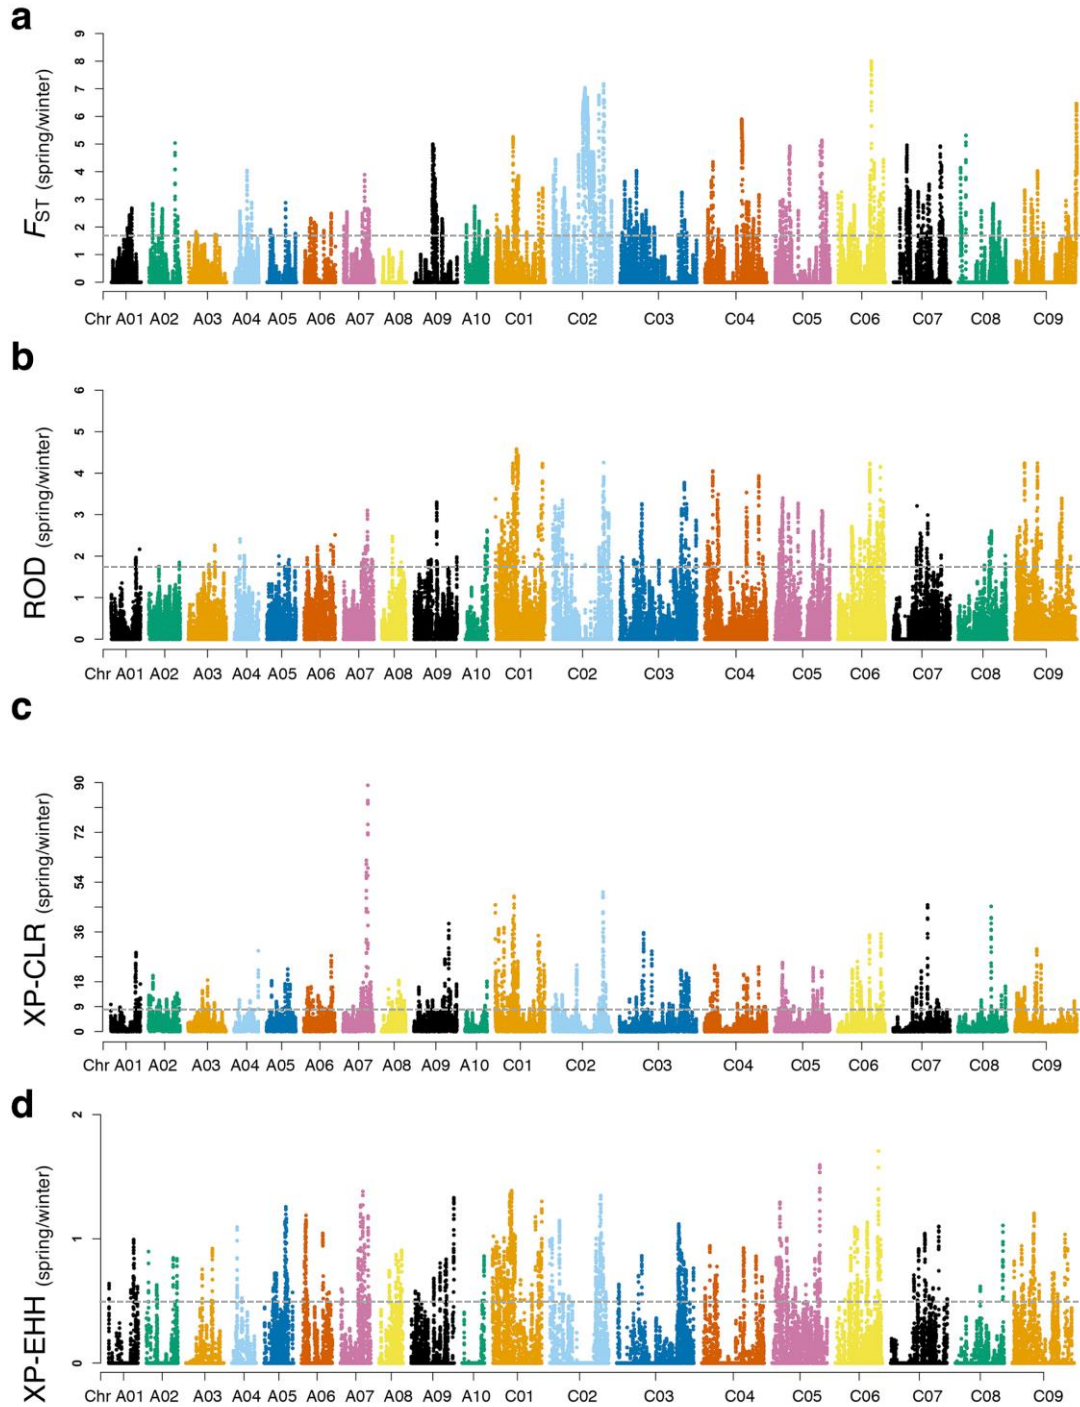

**Supplementary Figure 30. Whole-genome scanning of ecotype**

**improvement-selection signatures between spring and winter ecotype of *B. napus*.**

Ecotype improvement-selection signals detected using (a)  $F_{ST}$ , (b) ROD, (c) XPCLR,

and (d) XP-EHH comparisons.

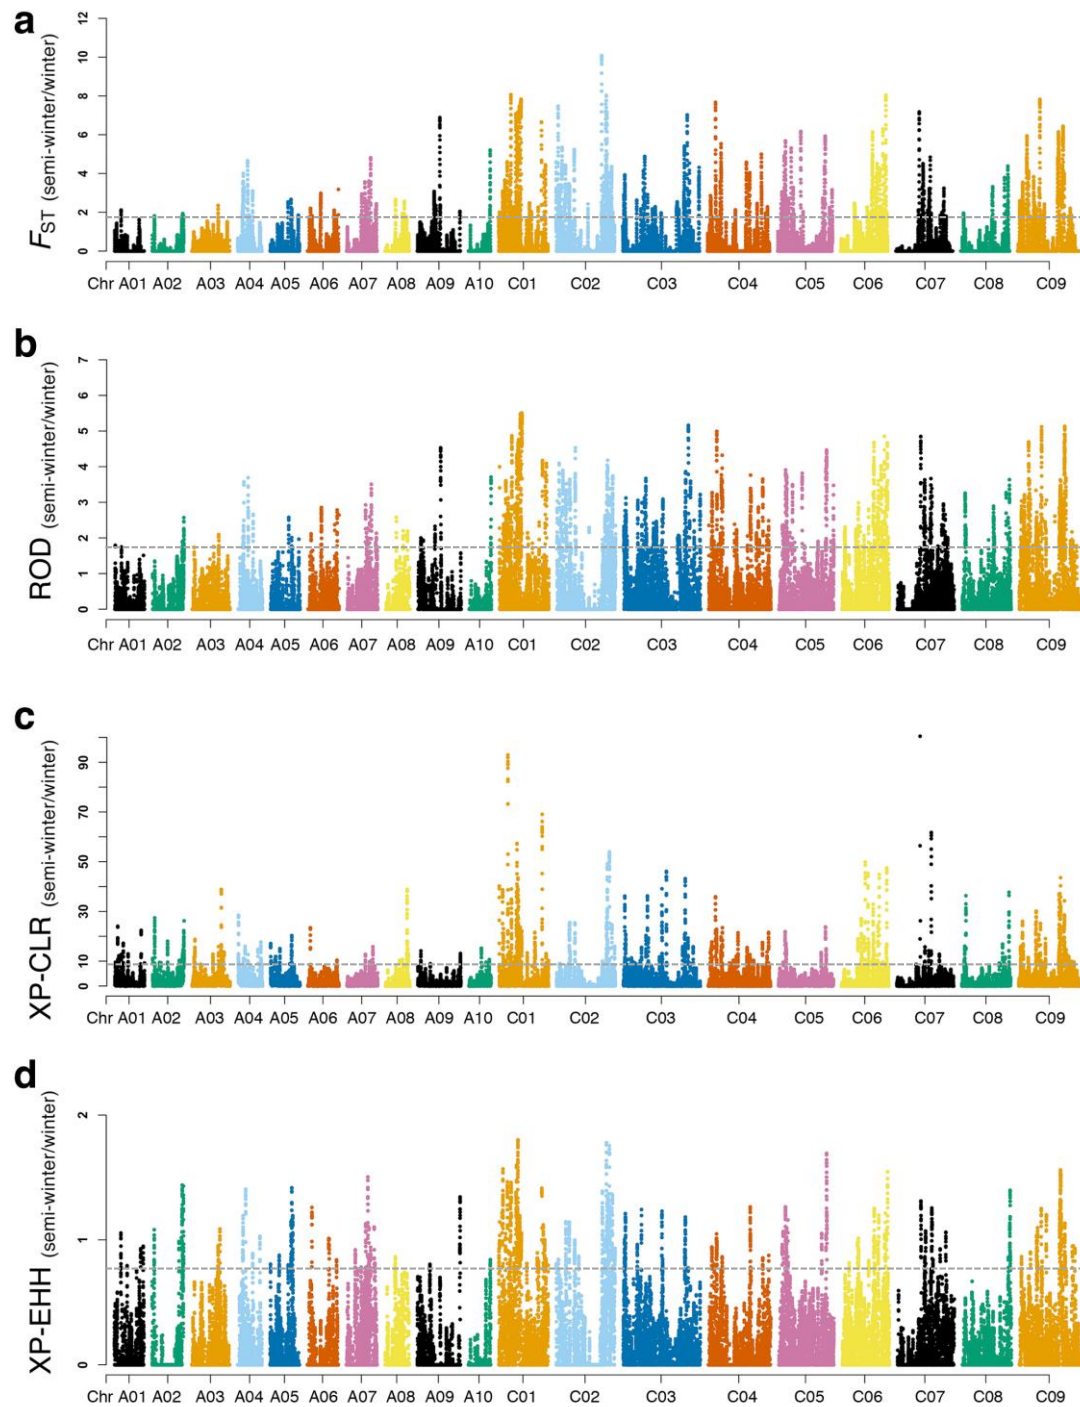

**Supplementary Figure 31. Whole-genome scanning of ecotype improvement-selection signatures between semi-winter and winter ecotype of *B. napus*.** Ecotype improvement-selection signals detected using (a)  $F_{ST}$ , (b) ROD, (c) XPCLR, and (d) XP-EHH comparisons.

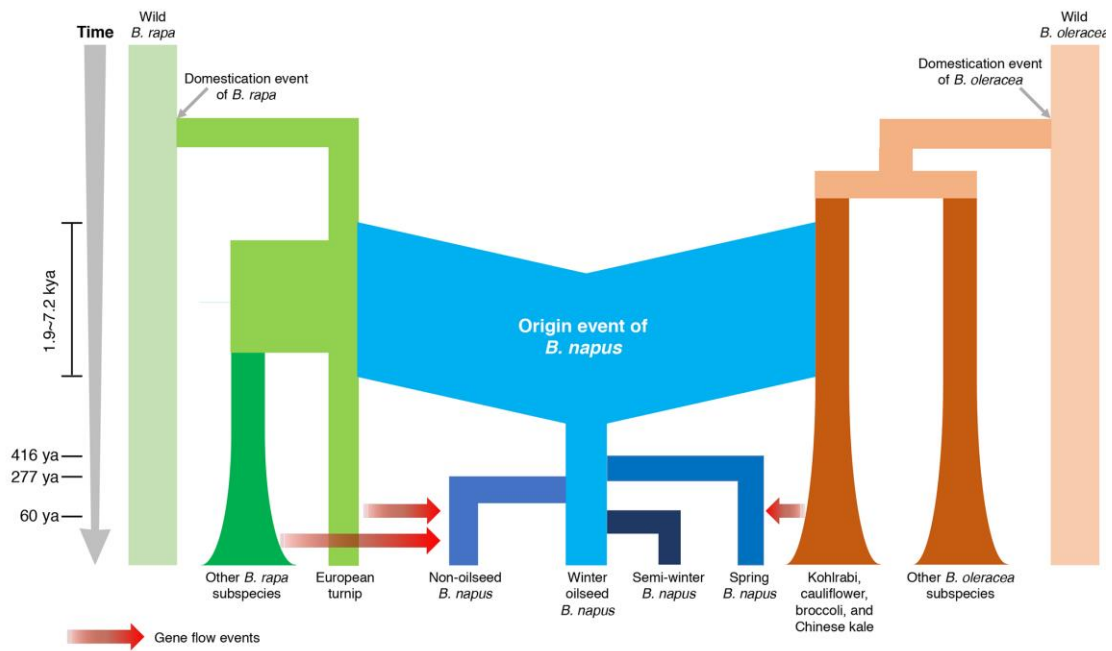

**Supplementary Figure 32. Proposed model for origin and evolutionary history of**

*B. napus*. The origin time of *B. napus*, and divergence times of spring, semi-winter and non-oilseed *B. napus* from winter oilseed *B. napus* were estimated using SMC++<sup>4</sup>.

Gene flow events were estimated using fastsimcoal2<sup>3</sup> and marked with red arrows.

**Supplementary Table 1. Classification of the 588 *B. napus* accessions.**

| Improvement  | Group             | Asia | Europe | North America | Oceania | Total |
|--------------|-------------------|------|--------|---------------|---------|-------|
| SSI          | Landrace          | 28   | 23     | 3             | 3       | 57    |
|              | Improved cultivar | 55   | 19     | 0             | 1       | 74    |
| Seed quality | Double high       | 102  | 26     | 1             | 3       | 132   |
|              | Double low        | 207  | 51     | 7             | 2       | 267   |
| Ecotype      | Winter            | 14   | 53     | 0             | 0       | 67    |
|              | Spring            | 12   | 46     | 13            | 7       | 78    |
|              | Semi-winter       | 440  | 3      | 0             | 0       | 443   |
| Usage        | Oil               | 462  | 92     | 13            | 6       | 573   |
|              | Vegetable         | 4    | 0      | 0             | 0       | 4     |
|              | Fodder            | 0    | 10     | 0             | 1       | 11    |

**Supplementary Table 2. Comparison of LD decay among different groups of materials.**

| Comparison | Classification     | BraA (kb)   |             | BolC (kb)   |             | A subgenome of Bna (kb) |             | C subgenome of Bna (kb) |             |
|------------|--------------------|-------------|-------------|-------------|-------------|-------------------------|-------------|-------------------------|-------------|
|            |                    | $r^2 = 0.1$ | $r^2 = 0.3$ | $r^2 = 0.1$ | $r^2 = 0.3$ | $r^2 = 0.1$             | $r^2 = 0.3$ | $r^2 = 0.1$             | $r^2 = 0.3$ |
| Organism   | <i>B. rapa</i>     | 25.50       | 2.10        | NC          | NC          | NC                      | NC          | NC                      | NC          |
|            | <i>B. oleracea</i> | NC          | NC          | 432.20      | 27.90       | NC                      | NC          | NC                      | NC          |
|            | <i>B. napus</i>    | 179.60      | 4.30        | 1,172.40    | 121.40      | 322.70                  | 19.30       | –                       | 1,365.30    |
| Ecotype    | Winter             | 167.70      | 6.90        | 767.40      | 67.40       | 362.30                  | 31.90       | 1,356.10                | 411.00      |
|            | Spring             | 185.10      | 6.20        | 1,307.70    | 109.00      | 383.40                  | 34.80       | –                       | 1,634.40    |
|            | Semi-winter        | 239.90      | 4.50        | 1,198.40    | 108.70      | 411.00                  | 31.70       | –                       | 3,142.50    |
| Usage      | Oilseed            | 263.80      | 4.50        | 1,285.60    | 109.50      | 438.90                  | 33.30       | –                       | 3,592.50    |
|            | Fodder             | 2,127.00    | 21.30       | –           | 160.70      | 4,686.80                | 98.40       | 4,659.10                | 641.40      |
|            | Vegetable          | –           | 216.40      | –           | 1,381.00    | –                       | 3,093.80    | –                       | 3,032.10    |
| SSI        | Landrace           | NC          | NC          | NC          | NC          | 393.10                  | 23.80       | 4,743.50                | 660.30      |
|            | Improved           | NC          | NC          | NC          | NC          | 417.30                  | 32.70       | –                       | 1,365.30    |
|            | Cultivar           |             |             |             |             |                         |             |                         |             |

BraA denotes the SNP set called from *B. napus* and *B. rapa* accessions; BolC is the SNP set called from *B. napus* and *B. oleracea* accessions (Methods). Negative sign indicates that the LD does not drop below the threshold of  $r^2 = 0.1$  or  $0.3$ ; NC indicates no calculation, since the LD decay is not accurately calculated from corresponding SNP sets.

## Supplementary References

1. Gutenkunst, R. N., Hernandez, R. D., Williamson, S. H. & Bustamante, C. D. Inferring the joint demographic history of multiple populations from multidimensional SNP frequency data. *PLoS Genet.* **5**, e1000695 (2009).
2. Chalhoub, B. *et al.* Early allopolyploid evolution in the post-Neolithic *Brassica napus* oilseed genome. *Science* **345**, 950–953 (2014).
3. Excoffier, L., Dupanloup, I., Huerta-Sánchez, E., Sousa, V. C. & Foll, M. Robust demographic inference from genomic and SNP data. *PLoS Genet.* **9**, e1003905 (2013).
4. Terhorst, J., Kamm, J. A. & Song, Y. S. Robust and scalable inference of population history from hundreds of unphased whole genomes. *Nat. Genet.* **49**, 303–309. (2017).
